# Supplementary material
Source: publisher figshare collection journal article supplement (https://springernature.figshare.com/ndownloader/files/21687624)
Supplement: Supplementary file 1 [file 21687624]

## Sheet: Sheet1
Table S3. List of 160 BPA genes identified in representative species
Classification	Species	Gene ID	Protein Sequence	Protein Length
Plant	Amborella trichopoda	ERM93813	MEKGDNGVQMFLSEEWTKIMEFKHVYTCCSESYAVLEVKVCCMMACELASQIPLDHSVPSMGMEFPLNQTSNWTIDVSDVRTVKVSNISLRASQQDIKEFFSFSGDIQYVEMQRESEGSQLAYVTFKDSQGADTAILLSGATIADLSVTIAAAENYQLPLEALPPPSANESTLSGTAGAVIKKAEDVVSSMLAKGFVLGKDALSKAKAFDEKIHLTSNVASLDRKIGLSEKLSIGTAAVNEKVREMDEKFQVYEKTKLALAAAEQKVTDAGSAIMSNRYVSTGASWVTGALNRVAKAAEDVSLMTKEKVGKAEEEKMDTISRQRTDLVDEFARIHLADSPREATLAVHSTDELRDVDKLGII*	363
Plant	Amborella trichopoda	ERN15517	MSIRTVKVSNVSLGATEQDIKEFFSFSGDIEYVEMKSDNERSQIAYVTFKDSQGAETALLLSGATIVDLSVNVTPAVNYQLPPAASAPPMTKDSSKVASGAESAVQKAEDVVTSMLAKGFILGKDAVNKAKALDDKHQFTSSATAKVASIDKKIGLSEKISMGTAVVNEKVREMDQKFAVSEKTKTAFAAAEQKVNSAGSAILKNRYVFTGASWVAGAFSRVTKAAEDVGLKTKEKVEKAEDKERREMVEGYTQVHLSDSPKSPSHEPSSKPPPAQGLVL*	281
Plant	Amborella trichopoda	ERM94403	MSLPGYTVEVTNLSPNASEKNVEDFFAFSGTVEHVEITRCGDYACTAYVTFKEPYALNTAVLLNGATIVDQPVCIARWGHYDDAFDLWDQPWMVDNDSAYMASHESHLVSTPGEALTIAQDVVKAMVSKGYVLGKDALIKAKAFDESHHVTASAMAKAAELSRRIGLTDKIETGVGAIRSVDERYRVSDTTKSVIEVTGKTAAAATTAILNSSYFSAGALWVSGALSKAAKAAADLAVHGANK*	244
Plant	Amborella trichopoda	ERM93596	MGTRTVQVGHVSPLAGEREIKEFFSFSGEIEHIEIYRGRESRDSQTAFVTFRDPKALEIALLLSGATIVDQIVSVTPVENYVPNVEASDNMNPSSNVQLHDSMNPSSNARVYVSKAQDVVTSMLAKGSAFGQDAVNKAKAFDEKHRLTANASAKVISFDRRVGLTEKLTVGVAVVNEKVKSVDQKLQVVDRTMAVLTVAERKLNGTSSAVKTNRYVSVGAAWMSDAFSKVAKASHVAGAKTREKFQLAVSNLTAKEPGIST*	262
Plant	Arabidopsis thaliana	AT5G16840.2	MASQVRSVKVGNLSSGATEHDIKEFFSFSGEVESIDIQSSNEHSAYVTFKETQGAETAVLLSGASIADQSVIIELAPNYSPPAAPHAETQSSGAESVVQKAEDVVSSMLAKGFILGKDAVGKAKAFDEKHGFTSTATAGVASLDQKIGLSQKLTAGTSLVNEKIKAVDQNFQVTERTKSVYAAAEQTVSSAGSAVMKNRYVLTGVSWAAGAFNRVAQAAGEVGQKTKEKVEAEQPSQPAQSQQQLPEGYSPIHSSEYSKN*	261
Plant	Arabidopsis thaliana	AT4G17720	MTMTTVKVSNVSLGATDRDLKEFFSFSGDILYLETQSETERTKLAYVTFKDLQGAETAVLLSGATIVDSSVIVSMAPDYQLSPEALASLEPKDSNKSPKAGDSVLRKAEDVVSSMLAKGFILGKDAIAKAKSVDEKHQLTSTASAKVASFDKKIGFTDKINTGTVVVGEKVREVDQKYQVSEKTKSAIAAAEQTVSNAGSAIMKNRYVLTGATWVTGAFNKVAKAAEEVGQKAKEKVGMAEEEDKRKVVDEFARVHLSESPKAASSTQEAERESKLSESPEAKKDSEHLEPQSKPLQQQSPPPMASAPAPAQP*	314
Plant	Arabidopsis thaliana	AT1G67950.3	MSVTAAFIDSDQTQHNILMDSQSTVSGVKTVKISNVSLIVSKKDVKEFFSFSGDIQYVEMRSETQESQVAYVTFKDSQGAETAMLLTGAVIADLRVSITPAVNYQLPPEALALDSQEHSFNGFSVKKAEDVVNIMVGRGYALGKDAMEKAKAFDDRHNLISNASATIASLDDKMGLSEKLSIGTTVVNEKLRDIDERYQVREITKSALAAAEETAISARTALMANPYVSSGASWFSNAFGAVTKAVKEKVENGGEGRKEIITLDPSSPKVPAVVPVKLG*	280
Plant	Arabidopsis thaliana	AT1G14340	MDHQFGYGVEVTGLSPSVTHNDLIDFFSFSGTIQDIDIVRSGEQACTAYVMFKDSYSQETAVLLTGATILDQRVCITRWGQHHEEFDFWNATSRGFEDESDSQHYAQRSEFNAGEAVTKAQEVVKIMLATGFVLGKDALSKAKAFDESHGVSAAAVARVSQLEQRIGLTDKIFTGLEAVRMTDQRYHVSDTAKSAVFATGRTAAAAATSVVNSSYFSSGALWLSGALERAAKAASDLGTRGSRQ*	245
Plant	Arabidopsis thaliana	AT5G32450	MQTTRSVQVNNVSDLATEREIHEFFSFSGDIEHIEIQKEFGQSRIAFVTFTDPKALEIALLLSGATIVDQIVTITRAENYVQRRETQEVRMLDNAMPLGLQESTTQTKTNMDGNSRAYVSKAQDVVATVLAKGSALGQDAVNKAKAFDEKHQLRANASAKVSSFDKRVGLTEKLSVGISAVNEKVKSVDQKLQVSDKTMAAIFAAERKLNDTGSAVKSSRYVTAGAAWFSGAFSKVARVGQVAGSKTKEKFNLAVSNMSSKDTPIAV*	268
Plant	Arabidopsis thaliana	AT5G46870	MSMVTVKVSNVSLEATERDLKEFFSFSGDIAYLETQSENDGSKLAYVTFKDLQGAETAVLLTGSTIVDSSVTVTMSPDYQLPPDALASIESLKESNKSSSPTREDVSVFRKAEDVVSGMISKGFVLGKDAIAKAKSLDEKHQLTSTASARVTSFDKRIGFTEKINTGTTVVSEKVKEVDQKFQVTEKTKSAIAAAEQTVSNAGSAIMKNRYVLTGATWVTGAFNRVSKAAEEVGQKAKEKVGLAEEEEEEKKKVVDEVAIVHLTESPKALDQSEQDSKLPESKSQPHKELNASVV*	296
Plant	Arabidopsis thaliana	AT3G01210	MYPCGYVAQVTNLSPQATEKDVHRFFSHCGIVELVEITGCQGDALTAYVTFRDAYALDMAVLLSGATIVDQTVWISVYGVYLHESNNLRQEEDYSVTVTRSDAFASSPGEAITVAQQVVQTMLAKGYVLSKDAIGKAKALDESQRFSSLVATKLAEISHYLGLTQNIQSSMELVRSADEKYHFSDFTKSAVLVTGTAAVAAATITGKVAAAAATSVVNSRYFANGALWFSDALGRAAKAAAHIGGGGSN*	250
Plant	Brachypodium distachyon	KQJ84329	MATSTLSTVMVSNLSLKAAQRDVKEFFSFSGDILHVEMQSADELSQVAYITFKDKQGAETAILLTGATIVDMAVIVTPATDYEVPASVLAALEPKDGKSAVLEKAEDIVGTMLAKGFILGRDALDKAKALDEKHQLTSTATARVSSFDKRIGLSEKISVGSSVVNDKVKEMDQKYLVSEKTKSALAAAEQGVSTAGSAIMKNRYVLTGAAWVTGAFSKVANAANDVGAKAKEKIVAEQEGKTVERESAQGNISDDPAKHKDSDDDFAKVHVSETTEDIPISRAATVPITEEGSSNATPLPPAPKKPEPAQGLIL*	315
Plant	Brachypodium distachyon	KQK00860	MGSTVKVHNVSLQASERDIKEFFCFSGNIIHVEMQSGDQRSQFAYITFKDDQEAERAMLLTGATIVDMAVIITPATNYQLPAAVLADLESKTPRVIESALQKAEDVVGSMLAKGYVLGKDALEKAKTFDETHQLTTTATAKVSSIDKSLGLSEKISTGTLVVNEKMKEMDEKYQVAEKTKSALVAAEQTVSTAGSKIMSNRYILTGAAWVTGAYNKVATTATDTYNKEMMMAEQDDTKKDELMKSHLHESCEEAGHERKHQEGDPAKVPIVESTETGQMADQKGECPKTNMPEGSERGIEELNNQDGEIAKDQGQENTEMGLEGDKHQQTELPKANTPESLLMAEQTEQERKHPDSEFANTRTSDSPVTIPVCTATADDKSSNTPEKPEPAQGFI*	396
Plant	Brachypodium distachyon	KQK19994	MAAAAAPVEVPATGPVKTVKVTNVSLSATEQDIKEFFSFSGDIEHVEMQSGDEWSQVAYVTFKDAQGAETALLLSGATIVDLSVIIAPAPEYQPPPTASAPLMSGTRVPVGGDNVVHKAEDVVSSMLAKGFTLGKDAVGKAKAFDDKHGFTSTAGAKVASIDKKIGLSEKFTMGTSVVNEKVKEMDQKFQVSDKTKSALAAAEQTVSSAGSAIMKNRYVFTSASWVTSAFSKVAKAATDVGTMTKEKMSAEEQHKGSGPSSGGYTPIR*	269
Plant	Brachypodium distachyon	KQK13530	MEVRTVKVGNISLSALKREITEFFSFSGDIEYVEMQSESEWSQLAYVTFKDSQGADTAVLLSGATIVDRSVIITPVENYQLPPEACKQLSGEKSLSTESAVRKAEDVVSSMIAKGFVLSKDALNLARSFDERHNILSNATATVASLDRQYGLSEKITLGRAVVGSKCKEVDERYQVSELTKSALAVAEQKASIAGSAIMGNQYVSAGASWLTSAFGMVTKAAGDMSTMTKDKVDRAEEERKEIMWEERNGLVSEYAKIHLDEHSSWEPAVLPLESVDEQKLQAV*	285
Plant	Brachypodium distachyon	PNT63486	MQESFMAVRLAPGCLRVEVAPRPDQFSSSSSPQPSPQLRTSPSWTIDVPNARTIKVTNISGSATADNIKEFFSFSGDIEYVEMRRESETSQVAYVTFEEFHGADTALLLSGASISDASVNITPVEDYDLPPEAYTHAEELGSPRTPTEAAVKKAEEVVSTMLARGFVLSKDALKRARSFDDRHQLLSSASARVARLDRRFGLSDKFTLAVRGVDERLQVSERARGAITTAETIVASSPYASRGAAWVSAAVGAVARAAADVGAMTMDKVESMNDDGVDSATPPAAAQVHAVQVDDVARAGACS*	304
Plant	Brachypodium distachyon	KQJ84898	MSGTGYTVEVTNLSSSASESDLHEFFSFSGPIEHIDLIRSGEYGCTAYVTFKEPYALETAVLLSGATIVDQPVCISRWGHPDEPCNFWDRPTWQYEEEIEYRDYQSCQFNATPQEALTVAQDVVKMMLAKGYVLSKDALSRAKAFDESHQISGSAAARAAELSKRIGLTDRVSAGVGAIRSVDETYNVSKTTKTVATATGRTAVKVVNTIVTSSYFSAGAMMVSDALTRAAKAAENLAAHGRQN*	245
Plant	Brachypodium distachyon	KQK13210	MEEGRREARTVRVRNISDLAGEREVREFFSFSGEIEHVDIRFDGVATGRTAYVTFKEPKALEIALLLSGATIVDRVVNITSAEDYIYLPVNEQQLVVNEVTSTAPTVDLEQPNEANASPTSGRVYASKAHDVMTTVIARSSAIRQDAVNKAKSFDEKHQLRANASARISSFDRRVGLSEKLNTGISVVNEKVKTVDQRLHVSDKTMAALLAAERKLNDTGSAVKTNRYVSAGTSWLNGAFSKVSKAGHVAGSRTREKFQLAVSNISAKGPAVVA*	275
Plant	Brassica rapa	Bra023585.1-P	MAIRSVKVGNLSSGATEHDIKEFFSFSGEVESIDIQGDEHSAYVTFKDPQGAETAVLLSGASIADQSVVIEMAPNYTPPAAPHAETQSGGGGVAESVVQKAEDVVSTMLAKGFILGKDAVGKAKAFDEKLGFTSTATAGVASIDQKIGLSQKITAGTSLVTEKIKGVDQSFQVTERTKSAFATAEQTVSSAGTAVMKNRFVLTGVSWAAGAFNRVAKAAGEGGQKTKEKVEAEQPPQPSQSEQQAPEGYSPLH*	254
Plant	Brassica rapa	Bra006373.1-P	MAIRSVKVGNLSSGATEHDIKEFFSFSGEVESIDIQGNEHSAYVTFKDPQGAETAVLLSGASIADQSVIIEMAPDYTPPTAPHAETQSGGVGGAAESVVQKAEDVVSSMLAKGFILGKDAVGRAKAFDEKLGFTSTATAGVASIDQKIGLSQKFTAGTSLVNDKIKEVDQSFQVSERTKSAFASAEQTVSSAGTAVMKNRYVLTGVSWAAGAFNRVAKAAGEVSQKTKEKVEAEQPSQPSESDQQPPEGYAPIHSSEYSKN*	262
Plant	Brassica rapa	Bra008589.1-P	MVIQIRSVKVGNLSSGATEHNIKEFFSFSGEVENIDIQGGEHSAYVTFKDPQGAETAVLLSGASIADQSVTIELAPNYTPPAAPHAETQSGGGGAAEGVVQKAEDVVSSMLAKGFILGKDAVGKAKAFDEKLGFTSTATAGVASIDQKIGLSQKFTAGTTLVNDKIKEVDQSLHVSERTKSAYASAEQTVSSAGNAVMKNRYVLTGVSWAAGAFSRVAKAAGEVSQKTKEKVEAEHPPQPSQSQEQLPEGYAPIHSSEYSKK*	263
Plant	Brassica rapa	Bra040177.1-P	MTSVKVSNVSLGATERDLKEFFSFSGDILYLEMHSETERSKLAYVTFKDLQGAETAVLLSGATIVDSSVIVTMAPDYQLSTEALASLEPKEDSSKSPRASVFRKAEDVVSSMLAKGFILGKDAIAKAKSVDEKHQLTSTASARVASLDKKIGFTDKINTGTVVVGEKVREVDHKYQVSEKTKSAIAAAEQTVSNAGSAIMKNRYVLTGATWVTGAFSKVAKAAEEVGQMAKEKVGLAEEEDKRKVVDEFARVHLSESPSAAASSEGEESKFSESPEAKKDSEHQEPPQVQQAPPPPVALAQP*	303
Plant	Brassica rapa	Bra012646.1-P	MSMMTTVKVSNVSLGATDRDLKEFFSFSGDILYLETQSETERSKLAYVTFKDLQGAETAVLLSGATIVDSSVIVTMAPDYQLSPEALASLEPKESSKSPRAGGDSVLRKAEDVVSSMLAKGFILGKDAIAKAKSVDEKHQLTSTASAKVASLDKKLGLTDKINTGTVVVGDKVREVDHKYQVSEKTKSAIAAAEQTVSNAGSAIMKNRYVLTGATWVTGAFNKVAKAAEEVGQKAKEKVGMAEEEDKRKVVDEFARVHFSESPKAPSSKDEVVHEPKLSESPEPKESEHHEPQQQQQPQQQQSPPPVAPAQP*	313
Plant	Brassica rapa	Bra004270.1-P	MTVRSTGRKLSFEILSSLEDDSLPPIPRSSSDPISRNDSTESSSPKRRRHRKKKKHNNNNKVETIPENGDPQFTSVEDPSWASCDEGERSVFENRLNYFGGGGGGSTVVTQTIQHNGFSFGKLRQRNVNGSSIDSTNDERFSETMASEKENPPFEEVQNQFPRSETNGNVVVTRLDTESSLDWKQLMADDPDFLSAETRSPMKYFMGEIYGGVSLRSTTTSGNDVERERIYDMIFRLPWRCEVLLHTGFFVCVNSFLSLLTVMPIRVLLTFWGAFKKRQFRRPSSSELSDLACFLVLASGTILLGRTAQAITLSTCIVAHNNALLALLVSNNFAEIKSSVFKRFSKDNIHGLVYADAIERFHISAFLVSVLAQNILEAEGPWLGNFIYNATMVFFCEMM…	834
Plant	Brassica rapa	Bra019660.1-P	MDHQNGYGVEVTGLSPAVTEKDLVDFFSFSGAIEHIDIVKSGEQACTAYVMFKDSYSQETAVLLTGATILDQRVCITRWGQHHQEFDFWNAAPRSFEDEANSHPHPQRGEFNAGEAVTKAQEVVKSMLATGFVLGKDALTKAKAFDESHGVSAAAVARVSQLDQRFGLADKIFAGVEAVRLTDQKYHVSDKAKSAVSATGRTAAAAASSVVNSSYFSSGALWLSGALERAAKAASDLGSRGPRQ*	245
Plant	Brassica rapa	Bra016705.1-P	MDHQNGFGVEVTGLSPAVTEKDLIDFFSFSGAIEDIDIVRSGEQACTAYVMFKDSYSQETAVLLSGATILEQRVCITRWGQHHEEFDFWNATQRGFVDDTNSHPHPQRGDFTAGEAVTKAQEVVKSMLATGFVLGKEALAKAKGFDESHGVSAAAAARVSQLDQRIGLTDKIFAGVEAVRLTDQKYQVSDKARSAVSATGRTAAAAATSVVSSSYFSSGALWLSGALERAAKAASDLGSRGSRQ*	245
Plant	Brassica rapa	Bra039914.1-P	MQQQTRSVRVENVSDLATEREIHEFFSFSGDIDHIEILKDASEQSRVAFVTFTEPKALEIALLLSGATIVDKIVTITPAENYVPRREIMQQVGENTIPPTPTRQTADGNGGRAYVSKAQDVMATVLAKGSALGQDAVNKAKAFDELHQLRANASAKVSSFDKRVRLSEKFNVGISVVNEKVKSVDQRLQVSDKTMAAIFAAEKKLNDTGSAVKSSRYVTAGAAWFSGAFSKVARAGQLAGSKTKEKFNLAVSNIASKDTPIAV*	264
Plant	Brassica rapa	Bra024988.1-P	MSVSFSYPEFLIRLELMVTVKVSNVSLAVTERELKEFFSFSGEIVHLEMQSENEGGSKLAYVTFKDLQGAETAVLLTGATIVDSSVTVTMSPDYQLPPDALASIESSKESDKSSSSSPPKEDVSVFRKAEDVVRNMISKGFILGKDAIAKAKSLDEKHQLTSTASAKVTSFDKRIGFTEKINTGTTAVSGKVKEVDQKFQVTEKTKSAIAAAEQTVSNAGSTIMKNRYVLTGTTWVAGAFEKVSKAAEEVGQKAKEKVGRAQEDEEKKKEVDEVASVHFSESPKALDQPEQDSKLSVSPKDLDQPEHDSKLSESQLQPHKQEESTPSVASGQP*	334
Plant	Brassica rapa	Bra001017.1-P	MYPCGYVAEVTNLSPRATEKDVQSFFSHCGIVELVEITGCQGDDALTAYVTFRDAYALDMALLLTGATIVDQTVWISMYGVYLHESNNLTREEDYTVTVTQSHADAFASSPGEAVTIAQQVVKTMISKGYVLSKDAIGKAKALDESQGFSSLVANKLAEIGRYIGLTQNIQSSMEVVRSADDKYHFSDFTKSAVLVTGTAAVAAATITGKVAASAATTVVNSRYFANGALWFSDALGRAAKAAAHMGGGGSS*	253
Plant	Cucumis sativus	KGN55732	MSIKTVQVSNVSLGASERDIKEFFSFSGDIEYLEMQSETERSQTAYVTFKDAQGAETAVLLSGATIVDLSVNITLCPDYELPPEATAPPPAPGTKPPGAAESAFRKAEDVVSGMLAKGFILGKDALNSAKAFDEKHQLTSTASAKVATFDKKIGFTEKISAGTSLVSDKVREVDQKFQVSEKTKSAFAVAEEKVSNAGSAIMKNRYVMSGTSWVADTFNRVAKAAGEVGQKTKEKVVVTEEEQKKKTVEDFAKVHLSESPKAASAPPEEPQQRPKPEPAQGLIL*	285
Plant	Cucumis sativus	KGN63397	MATRTVRVTNVSLSATEKDLRDFFSFSGEIEFVEMRNDNERSQLAFVTFKDSKGAETSILLSGATIVDQPVSISSAPDYNLPAVDASAPVAVPVSTPALDNTTSTTNSTAGSAMQKAEDVVSSMLAKGFTLGKDALNKAKSFDERHQLTSTASSKVASLDQKIGLSEKISVGTTVVNEKVREMDEKFQVSEKTKAAVSNAGSAIMTNRYVLTGASWVSQTFQRVAKAAVDVSQKTKEKVLAEEDQGKHVGNSS*	254
Plant	Cucumis sativus	KGN49610	MSMRTVKVSNISKLTSERDIKEFFSFSGEILYVEMQRESENTQVAYVTYKDSQGADTAILLTGAKIGDLSVTITLVENYHLPPEAMSSILDKRQTVTGIAPNQAEDVVSTMLAKGFILGKDALNKAKAFDERLQLTSNASATVASIDRKMGITEKITAGTAVVNEKVREMDEMFQVREKTKSALAVAEQKATSAGTALMSNYYVLTGAAWFSNAVTAVTKAAEEVTQMTKVKVEKAEEEKKESIYRERTGIISNFAELHLDEPLPGEPAIVPVNSADR*	279
Plant	Cucumis sativus	KGN51899	MNPGGYTVEVTGLSPVATEKDVLDFFAFSGAIELVEIVRSGEDACTAYVTFKDAYSQETACLLSGAKIVDQRVCITRWGHFDDEFGFWSRPPGHQEEDSTPASAQRSQFISSAGNAVTMAQEVVKTMLAMGYVLGKDTLTKAKAFDESHQVSATAAAKVADLSHRIGLTDMLGAGYEAVKSVDEKYHVLETTKSAISATGRTAAAAADTVVRSSYFSRGALFMSDALNRAAKAAADLGSRGLEH*	245
Plant	Cucumis sativus	KGN52450	MEEEREIEEKRKLSTTNYHKRPIDDKHIVISQASIVKISVGSWKYPLQKTVPYGVALVYESLKATDSAPPSPAPFFSSFLSLSFQTGVVDISVFSKQTGGTPQVFCSNSSFQHRKLCETMYNGGYTAEVTSLSPKATENDVYDFFSHCGTVEHVEILRSGDYACTAYVTFRDAFALETAILLSGAEILDQCVFISRWGAYIDESDSWNSPAQMTNDNTSLMATKIMHSVHTPGEAVTMAQQVVKTMLSKGYVLTKDALVKAKAFDDSCQVSATAAAKVYELSNRIGLTETINSGMETVKYIDEKFHVSDITRSAAAVTGTAAVVAVTVTGKAAMAAGNAVINSSYFSKGALWVSDMLSRAAKAAAEAGKSISK*	374
Plant	Cucumis sativus	KGN53924	MQSQTRTVQVKHVSNLATEREINEFFSFSGQIERIEIQCEQGDSRTAFVTFRDPKALEIALLLSGATIVDQIVSISPVENHVPRREMQDSGSQSSSGKMYVNRAQEVVANVLAKGSAIGQDAMNKAKAFDEKHQLTANASAKVLSFDRRVGLTEKLTVGISVVNEKVKSVDQNLHVSDKTRAAIFAAERKLNDTGSAVKTSKYVTASAAWLNGAFGKIAKAGQAAGTKTREKFHLAMSNLTSKESPVVASS*	252
Plant	Cucumis sativus	KGN63348	MQSQTRTVQVKHVSDLATEREIHEFFSFSGEIEHIEIQCEQGESKTAFVTFTDPKALEIALLLSGATIVDKIVSITPAENHVPRREMQEVRVADNAACLTPTENNSPSIEDSASQPSSGKMYVNRAQEVVATVLAKGSAIGQDAMNKAKAFDEKHQLTASASAKVLSFDRRVGLTEKLTVGISVVNEKVKSVDQKLHVSDKTMAAIFAAERKLNDTGSAVKTSKYVTASAAWLNGAFGKVAKAGQAAGTKTREKFHLAMSNLISKEPPVVA*	272
Plant	Daucus carota	KZN01784	MSVRSVSVNNVSLSASENDIKEFFSFSGEIECIDWQSDTERSQIAYVTFKDAQGAEKAVLLSGATIVDQTVTIDLAPDYNLPLSAPAAPIETENQNVGETPMVVQKAEDVVSGMLARGFTLGKDALNRAKSFDERHRLTSSASARVASFDQKIGLTRRFSTGATMMNDRVKAIDQKLQVSEKTRTAFTTAQQKVNSAGSTIMKNRYLLTGTSWVVGAFSRVTKAAGEVGQKTKAKLSRDEGKKEAVGSGQVPGTDSVEGASASLPQNENLSGVTKALEEVEQKTKEKMSEHEERKVADGSGQVPTTHSAEAASASLPLKENLNSA*	326
Plant	Daucus carota	KZM87856	MADLSIPASQQSVSSISVNTKPDQPNKIKTVKISNLPSGASARDIREFFSSSGEIEYIEMHSYFEQSQIAYVTFKDSKGADNAARQTGNTILGSAVIITLASDNQLPRSASSSPQAIKGGAESPLRKAEGAVSSILAKGYVLSKGALDRAKTFDERHHLTRSTSEKIASFDKKIGLSEKVIFGASVVNGKVQEVDQKLQVSEKVKSAYATAGQTVTSARSAVMNNGYVNSGASMVTGAFDKVATAAEGVGKNTKAKLGMNDKQASTNNSGSPQPSDGREQLTSAPSMNKKTS*	293
Plant	Daucus carota	KZN07402	MALRFSLRLLVLLYSIFSLALHASTAVAHNDPIIQTMEQFSGYPPIQDPPVANSEETQQNQIRIVQVSNLSLWASTRSITLFFSSCGEVESVEMQSLSEQSQIAFVTFKHSLGADCAIMLSGTKLLDLTVIITLAPSREIQNTASFPHLATEDRAATYGADSYLTKTKNVFSSMVEKGYVLGKAVAVGTSDKVQQVDQNLQVSQKVKSAVAKSAVFGSEYVSIGASWVTVTFDSIAKAAAEVSQHAKEKVAIAEEEQRRKRTAEEDQGRKTM*	273
Plant	Daucus carota	KZN07403	MASCMLALCATMSLFGVLIKTVKVSNVSLGATLQDVQEFFSFSGDIFYVEMQSHDERSQIAFVTFKDAEGAETAVLLSGATIVDSTVTVALDPDYKPPAAAFVPPPVTQNITPKSGGSAMNKAEDVVTSMLAKGFVLGKDALGKAKAIDEKHKLTSTASSKVSSLDKKIGFTEKISVGTSIVTDKVKEVDQKLQVSDKAKSAFSVAEQKVSSAGSAVMKNRYVLTGATWVTGAFNKVAKAAGEVGQHTKEKVSMAEDEKRKKMVDEYAEVLSESPKASEASEHKPSKPAPAEGLIL*	297
Plant	Daucus carota	KZN06305	MDSRLYTIEVTSLSPAATEKDIQDFFAFCGKIEHVEIIRAGDLASTAYVSFKYAHALETAVLLSVTVHLKDVTMKHQMTMGATILDRPVCITNWGQSEDEFNIWNRPTWKIEDESSENHVSEGTRSVPSAGEAMSLAQDVVKAMVSKGYVLGVGALSKAKSFDESHQVSATATAKVAELSEKIGLTDKIYAGVGAVKSVDERYHIYDTTKSAVAATGRTAAAATNTVVNSSYFSKGALWMSDALSRAAKAAADLGNRDTSK*	262
Plant	Daucus carota	KZM93720	MVTRTVQVGHVSDLATEREIHEFFSFSGEIEHIEIRNDSRPKIAFVTFKDPQALEIALLLSGATIVDQIVSITPAENYVRQFVVQGESITDDNMRGGDASPHAENQTTSPSSGRVYVSKAQDVVSSMLAKGSALRQDAMNKARAFDEKHQLRANASARVNSFDKRVGLTQKFSVGISVVNEKVKSVDQRLQVSDKTMAALMAAERKLNNTGTAVKSSRYVTAGTSWLNGTFGKVAKAGQVAGTKTRAKWSMALSNLTAKDPPIAA*	266
Plant	Daucus carota	KZM99161	MQPNTRTVQVAHVSDLATEREIHEFFSFTGQIDSIEIRNDLRPRTAFVTFKDAQALEIALLLSGATIVDQIVSITPAENYVRQPVVQSESMADNSVNIVREDASQHTEQAQTTSPSNGRVYVSKAQDVVSTMLAKGSALKQDAMNKARAFDEKHQLRANASARVNSLDKRVGLTEKFSVGISAVNEKVKSVDQKLQVSDKTMAALMAAERTLNDTGSAVKSSRYVTAGSAWFNVAFGKVAKVGQVAGTKTKAKWNMAVSNLTAKVGVV*	269
Plant	Glycine max	KRH74377	MTIKTVKVSNVSLGATEQDIKEFFSFSGDIEYVELRSHDERSQIAYITFKDSQGAETALLLSGATIVDMPVTITQDPDYQLPPAALASSVRETQTPGGADSALRKAEDVVSGMLAKGFILGKDAVNKAKTFDEKHQLSSTASAKVASFDQKIGLSEKISAGATVVSDRVREVDQKFQVSEKTKSAFAAAEQTVSNAGSALMKNRYVLTGASWVTGAFSKVSKAAGEVGQKTKEKVEGAEEHQKRKVEDQYAQVLSESPKAAEASEQKSSKPAPAQGLIL*	280
Plant	Glycine max	KRH24024	MAVSVKVSNISSTATEQDLREFLAFPGKIEYIEMQSDKGNSQVAYVTFSNPEGAETAVLLSGAVVCGQSLTIALAPDHALPASAASATQTSNAESGESGLRKAEDVVTGLLAKGFILGKDALNRAKSFDERHQLTSTATAKVVSLDQKVGFTEKISAGTVIVNDKMKEMDEKFQVSEKTKSAISVAEQSVSSAGSAIMKNRYVLTGATWVTGAYSRVAKAAEEVGQKTKEKVLAQDNQGKTEEGAHVHTSISEPNQPSKTEPQQATTANQPSKPEQQATKDGQPSNSATTKD*	293
Plant	Glycine max	KRH39571	MTIKTVKVSNVSLGATEQDIKEFFSFSGDIEYVELQSHDERSQIAFITFKDSQGAETAVLLSGATIVDMPVTISLDPDYQLPPAALASPVRETRTPGGGADSAFRKAEDVVSGMLAKGFILGKDAVNKAKTFDEKHQLSSTASAKVASFDQKIGLSEKISAGATVVGDRVREVDQKFQVSEKTKSAFAAAEQTVSNAGSAIMKNRYVLTGASWVTGAFSKVSKAAGEVGQKTKEKVESAEEQQKRKVEDQYAQVLSESPKAAEASEQKSSKPAPAQGLIL*	281
Plant	Glycine max	KRH70368	MSIKTVKVSNISLVTFKKDIEEFFSFSGDIRYIEMQRESGHTQVAYVTFKDTQGADTAVLLTGSKIGDLYVTITPVEKYQLPPEALPSSPTNQSPDAVKKAEDVMSTMLAKGFILGKDAINKAKAFDEHHQLTSNASSTVASIDRKIGLSDKLSFGTAVFNGKVREMDERYQLSEMTKSAMAAAEQKASSAGSAIMSNPYVKSGASWFSSAFTAIAKAAEDVSTMTKEKVEQAVVERNEIIYGERKGTVDEFAKTHLEEASDIGPAVVPVNSDDDRKLATIL*	283
Plant	Glycine max	KRH49686	MSIRTVKVSNISLVTSKKDIEEFFSFSGDIRYIEMQRESGHTQVAYVTFKDTQGADTAVLLTGSKIGDLYVTITPVEKYQLPPEALPSSPTNQSPDAVKKAEDVMSTMLAKGFILGKDAINKAKAFDERHQLTSNASSTVASIDRRIGLSDKLSIGTTIVNGKVREMDERYQLSEMTKSAMAAAEQKANSAGSAIMNNSYVISGASWFSSAFTAIAKAAGDVSTMTKEKVEQAAVERNEIIYSERKGTVDEFAKTHLEEASDIGPAVVPVNSDDDRNLATIL*	283
Plant	Glycine max	KRH69305	MKLYNKTQDSFNLILLQKSLREEEITVCDSIASVSSIPAPLLFRKHKMNSGGYAVEVTGLSPKATDKDVRDFFAFSGVIENVEIIRSGDYACTAYVTFKDAYAQETACLLSGATILDQRVCITRWGHYEDEFDFWNQPSYSHEDETASTTPQSNQFVSSAGEAVTMAQEVVRTMLSKGYVLSKDALAKAKDFDESHQVSATATAKVSELSQRIGLSDKISAGIGAVKSVDQRYNVSETTMAAASTAGRSVAAAANSLVNSSYFSKGALWVSGALTRAAQVASDMGTHRDRQ*	292
Plant	Glycine max	KRH06674	MQVTETRTVQVKQLSDLAGVREIHEFFSFSGEIEHVEILSEDGKSKTAYVTFKDPKALEIALLLSGATIVDQVVKITPAENYVPNREMQEVRVVENAINVVPSENSENVSSNIEEGIASPTNRRIYLSRAQDAVTNMLAKGSAIRQDAVNKAKAFDEKHQLTANASAKVISFDKRVGLTEKLTVGIAAMNQKVKSVDQRLQVSDKTMAAIIAAERKINDTGSAVKTSRYVTAGTAWFNGAFSKVAKAGHVASSKTREKFHLAVSNLTSKEPSVAAA*	277
Plant	Glycine max	KRH01159	MYSGGYTALVTNLSPRATEDDVRNFFTYCGLIEHIEILRSGENASTAYVTYRDAYALETALLLNGSMILDQCIFISRYEAYVNDYDNWSSHASKPEYSITTSQDVHMDKFVGSPGEALTMAQVVVKTMVAKGYVLGKDAFVMAKAFDESHSVSSTAASKVAELSNKIGLTDTINSGIETFKSVDEKYHVTDFTKSAATVTGTTAIVVASVTGKAAVAAGTAIANSSYFAKGALWVSDMLTRAAKTAADLGQNEKK*	256
Plant	Glycine max	KRH40109	MTSMYSGGYTALVTNLSPRATEDDVRNFFTYCGLIEHIEILRSGENAPTAYVTYRDAYALETALLLNGSMILDQCIFISRYEAYVNDYDNWSNHASNPEYSITTSQDVHMDKFVASPGEALTMAQVVVKTMVAKGYVLGKDAFVMAKAFDESHSVSSTAATKVAELSNKIGLTDTINSGIETFKSVDEKYHVTDFTKSAATVTGTTAIVVASVTGKAAVAAGTAIANSSYFAKGALWVSDVLTRAAKAAADLGQNEKK*	259
Plant	Manihot_esculenta	OAY24375	MSVRTVKVSNVSIGATERDLKEFFSFSGDIEYVEVHRCSDNEQSQVAYVTFKDSQGAETAVLLSGATIVDLAVTITPDPDYELPPAALAPPPTETPGGAESAFRKAEDVVTSMLAKGYILGKDAVNKAKTLDEKHQLTSTASFKVASLDKKIGLTEKISVGTTIVGDKVREVDQKFQVSEKTKSAFAVAEQKVSTAGSAIMKNRYIFTSAAWVTGAFNKVAKAAGDVGSKAKEKVEIAEEEQKRKVVDEFAQVHLSESPKAPAEREEPPSKPAPVQGLIL*	281
Plant	Manihot_esculenta	OAY41733	MSIRTVKVSNVSLGATEQDIKEFFSFSGDIDYVELHSETERSQIAYVTFRDPQGAETAVLLSGATIVDQSVVIELAPDYKLPAAASVPTTPTEKTTAPGRESAIQKAEDIVSSMLAKGFILGKDALNQAKAFDEKHRFTSTATSKVASLDQKIGLSEKITAGTVLVNDKMREVDEKFRVSETTKSAIAAAEQTVSNAGSAIMKNRYVLTGASWVTGAFKRVAKAAGDVGQKTKEKVSAEEEQSRRAEGYTQIHESYSPNMSEQMSKSPH*	270
Plant	Manihot_esculenta	OAY29863	MYPGGYTAEVTCLSPRATVEDVYDFFSHCGPIEHVEIIRSGEYGSTAYVTFRGAYALETAILLSGATIVDQRICITRWGTYNMDESDPWNSWKVENSVGSTGIHVNHYASSPGEAVTVAQEVVKTMLAKGYVLGKDALIKAKAFDESHHVSATAAAKVAELSNRIGLTDKIQAGMETVRSVDQKYHVTDITASAVLVTGTAAVVAASYTGKAAVAAANAVVNSSYFARGALWVSDVLTRAAQAVADFGNSE*	252
Plant	Manihot_esculenta	OAY61427	MSAGGYTVEVTGLSPKATEKDLHDFFSFSGAIEHVEIVRSGEFACTGYVTFKDAYGQETAVLLSGATIMDQRVCIIRWGQYVDEFDLWNGPSSRVEDDTESTPPQRSQYVPSAGEAVTAAQEVVKTMLAKGYVLGKDALSKAKAYDESHQVTATAAAKVAELTERIGLADKIFAGMEAVKAVDEKYHVSDVTKSAVSATGRTAAAAAKTVVNSSYFSRGALWMSDALNRAAKVAADLGTRGVQQ*	245
Plant	Manihot_esculenta	OAY41909	MQTRTVQVKNLSDLASEREIHEFFSFSGEIEHIEILRENGQSKTAFVTFKDPKALEIALLLSGATLVDQIVGITPAENYVSDRELQEVRSVDNALSAVPAESTPSNVEQAKNIPPSNGRMYVNRAQEVVSSVLAKGSAFRQDAVNKAKAFDEKHRLTASASAKVSSFDRRVGLTEKLTVGISAVNEKVKSVDQRLQVSDKTMAAIFAAERKINDTGSAVKSSRYVTAGTAWLNGAFSKVARAGQVAGTKTREKFNLAVSNLTAKDSPIAV*	271
Plant	Manihot_esculenta	OAY44391	MQTRTVQVKHVSDLASEREIHEFFSFSGEIEHIEIIRENGQSKTAFVTFKDPKALEIALLLSGATIVDQIVSITPAENYVPNQETLEVRRADTSVSAVPAESSPSNVEAKTSPPSNGNIYISRAQEVVSTVLAKGSAFRQDAVNKAKAFDEKHRLTASASAKVVSFDQRVGLTEKLTVGISAVNEKVKSVDQRLHVSDKTMAAIFAAERKINDTGSAVKSSRYVIAGAAWLNGAFSKVARVGQVAGTKTREKFNLAVSNLTAKESPIAV*	270
Plant	Manihot_esculenta	OAY43806	MGRLDFTVKVLNVPPKVTVAELNTFFSYCGTVEKIQLHKNKDQLQWALVTFRQPYAYQTALLLNEASFAGHQIHITVPDLINETEKHEESTFIPATKAEAATERVASKGEVGMMKKTEDGVENYKLSGKGKMVMDRTRSAVNYAGQRMERIGTAIKSKDFVANGAQWISDLLDKASKRVSTLANGNASNPNSRKQK*	197
Plant	Medicago truncatula	AES95797	MSIKTVKVGNVSLGATERDIQEFFSFSGDIAYVELRSHDERSQTAYVTFKDSQGAETAVLLSGATIVDLSVNITLDPDYQLPPEALVSPVSESKTPGGADSALRKAEDVVTSMAAKGFILGKDAVNKAKTFDEKLQLSSKASATVASVDQKLGLSDKIGAGASVVSDKVREVDQKFLVSEKTKSAFAAAEQTVSTAGSAIMKNRYVLTGASWVTGAFNRVSKAAVEVGQKTKEKVENAEQQEKRQVEDQYAQVLSEPSKAAAAASEQQSSKPGPAPAQEDVVSSMAAKGFTLGKDAVNKAKTFDEKLQLSSKASVTVASIDQKLGLSEKIGAGASVVGDKVREVDQKFLVSEKTKSAFAAAEQTVSTAGSAIMKNRYVLTGASWVTGAFNRVSKAAVEV…	466
Plant	Medicago truncatula	AET03238	MSVKTIKVDNVSLGASEQDLKEFFSFSGDIEYVEMQSYDERSQIAFVTFKDPQGAETAVLLSGATIVDLSVKITLDPDYKLPPAALASSASEGKTPGGADSALRKAEDVVTSMLAKGFILGKDAVNKAKGFDEKHQLSSTASAKVTSFDQKLGLSEKLTAGASVVSGRVKEVDQKFQVSEKTKSAFAAAEQKVSTAGSAIMKNRYILTGTTWVTGAFNKVAKAAGDVGQKTKEKVENAEVEQNRKVEDQYAQVLSESPKAAATSELHSSKPAPAQGLIL*	280
Plant	Medicago truncatula	AET05466	MSVPVDHKDQGVGAVPQSTSTPNWTIHVSDIKTVKVSNVSMTATEKDIKEFFSFSGDIQYVEMQKETESTKTAYVTFKNSQGADTAVLLTGSNIANSPVTITPFENYQLPPEAQPFSPNQKQTPAAVKKAEDAVSTMLAKGFVLGKGAINRAKSFDERHHLISNASATVASIDRKIGLTDKLSIGTAIVNEKVREMDEKFQVSEKTKSVYAVAEQKASDAGSAIMSNPYVSTGASWVSSAITVVAKAAEDVTTMTMEKVEMAEVDKKEIIYSERKDVVDELSHIHSEKPSVGNTSPKDPVKSSDDSRFGII*	312
Plant	Medicago truncatula	KEH40657	MSASVDHTDQRAEAIPCSTATPNWTVHVSDIRTVKVSNISLITSKQDIEEFFSFSGDIQYIEMQRESDRTQVAYVTFKDSQGAETAVLLTGSKIGDLYVTISPVEQYQLPPEALPSSPTNQSADAVKKTEDVISTMLAKGFILGKDAINKTKSIDERLQLTSNASSAVASIDNKIGLSDKLSIGTTIVNEKVKEMDERYQLSEMTKSAIAVAEQKASSAGSAIMSNSYVLTGALWLSSAFSVVAKAAEDVSTMTMEKVEQAEVENKEIIYSERKGTVDEYAQMNFEDSLNGGPAVVPVSSENDGKASNFLT*	312
Plant	Medicago truncatula	AES96612	MNSVGDGYAVEVTGLSPQATDKDVYEFFAFSGAIQHVEIIRSGDYACTAYVTFKDAYSQDTACLLSGATILDQRVCITRWGQYEEHDFWSRPSYSHEEENSYTTQHQTQHSSQFVSSAGEAVAMTQEVVKTMLAKGYVLSKDALSKAKDFDESHRVSATATAKVSELSQKIGLTDKLSAGYDAVKSVDQKYNVSGTTMAAASATGRTVAAAANSVVNSSYFSKGALWMSGALTRAAQAASDLGNRGTKQ*	250
Plant	Medicago truncatula	AES80876	MQTRTVQVKQLSDLATEREIHEFFSFSGEIEHIQIVREYGKPKTAFVTFKDPRALEIALLLSGATIVDQIVSISPVENYVANRETQEVGVVEYAINIAPEDAASNTEEEKPGGRIYLSKAQDVVTTMLAKGSAIRQDAVNKAKAFDEKHQLTANASAKVSNFDKRVGLTEKLTVGLSVVNEKVKSVDQRLHVSDKTMAAIFAAERKLNDTGSAVKTSRYVTAGTTWLTGAFSKVARAGNVAGTKTREKFNMAVSNLTSKETSLVV*	266
Plant	Medicago truncatula	KEH27791	MSIKTVKVINVSLGAAKRDILEFFTFCGDIAYVELRSHDEGSQTAYVTFKDTHGAETAVLLSEVLLPEKQRFDSSHSTMVQIDSMSLLTYAMRLGKIMSLDVDTKRTGVAFHDPRLITQPLPRIYEYNF*	130
Plant	Medicago truncatula	AES77395	MYPGGYTAEITNLTPRATENDVQNFFGYCGVIERVDVIRSSDYESTAYVTFRDAYALETALLLNGSMILDRCISISRWETYTDDSNNWNNLTPNHEDSITYSQDMHMDKFVSSPGEALTMAQQVVKTMVAKGFVLSKDAFVMAKAFDESRSVSSTAANKVAELSNKIGLTETINSGIETFKSVDEKYHVTDITKSAATVTGTTAIVVATVTGRAAMAAGSAIANSSYFAKGALWVSDMLSRAAKSTADLGHHQNK*	256
Plant	Musa acuminata	GSMUA_Achr4P00600_001	MVHHLQVPMEQCNLRAGADPQPMNASNWTIDVSDVTTVKINNVSSAASVKDIEEFFSFSGHIKYIEMQRESEMSQLAYVTFKDSQGADTALLLSGSTIVDRCVTISRVENYQLPPEACRRTLEDESSPTNAAVGKTEDVVSTMLAKGFVLGKDALKRARSFDERHHFLSAASATIASLDRKMGLSEKFSTGTAMVSGKVREVDEQFQVSGITRSALAATEQMASNAGSAIMSNHYVSTGASWVSSALSKVAKAAEDVSTMTKEKVEKAEEQRKEIICRDRREMVSEFAQVYLDEPSVGEPAIVPVVSVDVKII*	314
Plant	Musa acuminata	GSMUA_Achr5P14070_001	MSVRTVKVGNVSLSASEQDIREFFSFSGDIEYIEMQSGDERSQVAYVTFKKSDGAEMALLLSGATIVDMTVIITPATDYQLPAAASIPYMSKDGAASNKETSIQKAENVISTMLAKGLILGKGALESAKSFDEKHQLSSTAMTKVSNLDHKIGLTEKISTGTSAVNEKVLEMDHRYQVSEKARSAITAAEQKISNVGSAAMENKYVFAGVSWMIGAINKVTKTASEVGTKAVEKATAEQQQNKSSPEDAQDRVHSPETSVASPPDHPKKPEPVQGLIL*	279
Plant	Musa acuminata	GSMUA_Achr8P14700_001	MSFVDFAMFVSTVKISNVSRGASVQDIKEFFSFSGDIVYIEVQSVDESSQVAYVTFKDSQGAETALLLTGAKICDLVIDITPAVDYQLPATVLIPPASNDGDEGAGGIGSAVRKAENVVTTMLAKGFVLGKDALNKAKSFDEKHQLTSTASAKVSDLDKRMGLSEKISMGTAAVNEKVMEMDQKYQVSEKTRSAIAAAEQKVSTAGAAIMKNRYVFTGAAWVTGAFGKVARAASDVGTKAMDKAATEQERRKVEEQLAKGHDESGDPKDSTTSSKDSTTSDDSPTSKDSPTKHQDKPEPAQGTIL*	306
Plant	Musa acuminata	GSMUA_Achr9P23330_001	MSVRTVKVSNVSLSASLHDIKEFFSFSGDIEYVEMQSADEWSQIAYVTFKDSQGAETALLLSGATIVDLSVIVTPAPEYQLPVTVSAPTVNKEVKVTGGGESASHKAEDVVTSMLAKGFILGKDAIGKAKAFDEKHQLTSTASAKVSSFDKKIGLTEKISMGTSAVNEKVKEMDQKFQVSEKTKSAFAAAEQKVSVAGSAIMKNRYVFTGASWVTGAFNKVAKAASDVGSKTKEKVAAEQEHRI*	245
Plant	Musa acuminata	GSMUA_AchrUn_randomP02880_001	MAVKTVKVSNVSLSATMQDIKEFFSFSGDIEYVEMQSADEWSQIAYVTFKDSQGAETALLLSGATIVDLSVIIVPAPEYQVPPAASSPPVQKDDNASSSAGSAVQKAEDVVSSMLAKGFILGKDAVNKAKTFDEKHQLTSTASARVASFDKKIGLSEKISTGTSAVGEKFKEMDQKFQVSEKTKSAFAAAEQKVSSAGSAIMKNRYVFTGASWVTGAFNKVAKAASEVGSKTKEKVVAEQEHKTRSEDDFAEVHLSETPKAASAEHSSKPTSAQGLIL*	279
Plant	Musa acuminata	GSMUA_Achr3P19960_001	MSLSGYTVEVTNLSPNATERDLYDFFSFSGAIEHIEIIRTGEYASTAYVTFRDPHALETAVLLSGATIIDQHVCITRWGSYDEDCSFWNRPSHEDNTQSTMPEVNHLNTTPREAVTMTQEVVKTMLAMGYELSKDALIKAKAFDESHHVTATAAAMVADLSNRSGLTDKINAGLNAVTSVDERYHLSATTKAVVSATTRTAANITNSVVSSSYFSAGALLVSDALNKAAKVAADLATHGAKR*	243
Plant	Musa acuminata	GSMUA_Achr6P16310_001	MGALDLTVKVSNVSPKTSRADLIFFFSYCGTVDEIQLQRDGDQSQTALVTFRQPYAFETALLLSGAPILDRSVRILPAGNWKDIPVD*	88
Plant	Musa acuminata	GSMUA_Achr4P10680_001	METRTVQVGNISDLAGEREIREFFSFSGDIEHLEIRGDAGTPRLAFVTFKDPKALEIALLLSGATIVDRIVSIAPVENYVPMVEQVEANEAEFTTPFGNNVTYVEGKNSPNSGRVYVSKAHDVVSSMLAKGSALRQDAINKAKAFDEKHQLRANASAKVVSFDKRVGLSEKITVGISIVNEKVKSVDQKLHVSDKTMAALFAAEQKLNDTGTAVKSNRYVTAGTAWLNGAFGKVAKAGHVAGTRTREKFQLAVSNLTEKDPVVAA*	266
Plant	Musa acuminata	GSMUA_Achr8P04640_001	METRSIRVANISDLAEEREIREFFSFSGDIEHIEIRGNVGSGRIAFVTFKDPKALEIALLLSGATIVDQIVSITPAEDYITRSEEQVMADNVTIEAPVSIYSPTVEGKSSPGDGQVHVSKAHDVVAAMIAKGSAFRQDAISKAKAFDEKHQLMAKASAKVSSFDKRVGFKEKITVGISVVNEKVKSVDQKLHVSNKTMAALTVAEQKLNDTGTAVKTNRYVTAGTAWFHGAFGKMAKAGHVARTKTREKFQLAVTNLTAKDPVVAA*	267
Plant	Oryza nivara	ONIVA06G00820.1	MDVKPALAVLRKFFSAVRTVKVTNVSLSATVQDIKEFFSFSGDIEHVEMQSGDEWSQVAYVTFKDPQGAETALLLSGATIVDLSVIIAPAPEYQPPPTSSAPPMYSATSVPVSEDNNVVHKAEDVVSTMLAKGFTLGKDAVGKAKAFDEKHGFTSTAGAKVASIDRKIGLSEKFTIGTSIVNEKVKEMDQKFQVSDKTKSAFAAAEQKVSTAGSAIMKNRYVFTGASWVTNAFNKVAKAATDVGTMTKEKMAAEDQHKGSGPSGGHSYTPIQ*	273
Plant	Oryza nivara	ONIVA03G33140.2	MQANVRTVKVSNISLNASKREITEFFSFSGDIEYVEMQSESERSQLAYVTFKDSQGADTAVLLSGATIVDRSVIITPVVNYQLPPDARKQSAGEKSSSAESVVRKAEDVVSSMLAKGFVLSKDALNVARSFDERHNILSNATATVASLDRQYGVSEKISLGRAIVGSKVKEVDDRYQVSELTKSALAAAEQKASIASSAIMNNQYVSAGASWLTSAFGMVTKAAGDMSSMTKDKVDRAEEERKAIMWEERNGLVSDYAKIHLDEPSSWEPAVLPLESVDEQKLQAV*	287
Plant	Oryza nivara	ONIVA04G24910.1	MRARNGSPSMVSTIKVHNVSLEASEQDIREFFSFSGVIVHVEMQSGDERSQFAYITFEDDEGAERAMLLTGATIVDMSVIITPATNYQLPAAVLADIESKNAGGVESALRKAEDAVVSMLAKGFVLGKDALERAKSFDEKHQLTSTATAKVTSLDRKMGLSQKFSTGTLVVNEKMKEMDQKYQVAEKTKSALAAAEQTVSTAGSAIMSNRYILTGAAWVTDAYSKVATTATDAGAKSKEMVVAEQDDKHQDDKPAKDYSPISSKEFVQEGKHQEGERPKKNMPEKPEMGKRELENQEAAIPTAHAQENAQITGKEHKHQEADLPKADIPGSFTMAAKSEKHRNPYSELSKTHIPGSPATIPVCTATTDVNSTKTPKKPENAEGFI*	386
Plant	Oryza nivara	ONIVA11G16090.1	MQESFMAVRLDPGYLRIGVTPPQFSTSSPSPPPSPPHQLISTSPNWTIDVSDARTIKVTNISMSATADNIKEFFSFSGEVEYVEMRRESETSQVAYVTFKEFHGADTALLLSGASISEASVNITPVEDYVLPPEAYFYRQDTGSPRTPTEAVVKKAEEVVSTMLAKGFVLSKDALKRARSFDDRHQLLSTASARVASLDRRFGLSDKFSAGTAAARGAVRGVDERFQVSELARVAVTAAEQGAASVVASSPYASRGAAWVSAAVGAVARAAFDVGAMTKEKVERAEEEEHGAVAGAAAGDVAHASVQVDAPPSPAHAAREQPDGHYKNKMM*	332
Plant	Oryza nivara	ONIVA04G25380.1	MAHVNEPPVPPPLPRTDWLSREEEDDLGATGERSQAKPLGAGRGSRGKTEKNSRKGGIFSAQISCRIMSGTGYTVEVTNLSSRASESDLHEFFSFSGAIEHIELIRSGEYGSTAYVTFKEPYSLETAVLLSGATIVDQPVCIARWGQPNEPYNFWDTPNWYTEEEIEYRTYQTCQFNSTPQEALTIAQDVVKTMLARGYVLSKDALARARAFDESHQVTATAAAKAAELSKRIGLTDRVSGLTDRVSAGVGAIRSVDETYHVSETTKTVATATGRTAVKVVNGIMTSSYFSAGAMMLSDALHRAAQAAADLAAHGRHN*	319
Plant	Oryza nivara	ONIVA03G35520.1	MEGERRAVRTVRVRNISDLAGEREVREFFSFSGEIEHVDIRCDGVATGRTAYVTFKDPKALEIALLLSHVCKSDKCASISTEIVIMKHSAQITIQ*	96
Plant	Ostreococcus tauri	jgi|Ostta4|30295|0100010283	MSAITRDPPRRSRPLTNDIESRARIHCEQVTNVAPSAEESNLREFFSTAGEIERVRIFDGSAKTGGRRAVIEFTHKEAVSAAVLLNGCLLLNHPLNIVECAYPVSDDVANEDVKLNTFESKFAGFLGKTLLAGKQALEAVKDFDERNQITAKTKQNIKALDDKLQFTANVKKFDEKAGVTEGVKKTVATVNAQAKEIDRSLKISATTNAVVGMGKDAAGMAVNKAMQNKVISDAAATVSDFSTSASIKMKTVAAEAKATANIGGPTDIQSTETSTTTQTPAVTETPAATEEPVSASI*	298
Plant	Ostreococcus lucimarinus	ABO94143	MSAITVTNVAPSAEESNLREFFSTAGEIERVRIFNVATKSGRKAVIEFTHKEAVSAAVLLNGCLLLNHPLNIAECAYPVSDDVANEGTTLNSFESKFAGFLGKTLLAGKQAMAAVKDFDERNQITAKTKENIKAMDEKLQISSSMKKFDEKAGLSTGVKKLSTTASAQVAEIDKSLKITATTNAVVGIGRDAAGMAMNKAMESKVISSATTTIGEGLSQATNKVKAVTAEAKATAKVGEPEVNVDLTQVQDASAPTVEPEAVPSN*	266
Plant	Physcomitrella patens	Pp3c18_3230V3.2	MAGVHTVRVSNVSLKANEHDIQDFFSFSGEIEHIRLLSDGELSQIAFVTFKEAQALETALLLSGATVVDKAVTIAPADESERLATSVDNVSLDSTSTDKPSDASAPKPVTKSAQEAFQSMLEKGYILGNNTMSKAKAFDEKHQLTANASQLAENAKANASQLAENAKANASQLAANAKANVVNIDNKIGISQKLSAGTAAINQQVKAVDEKYHVSEKTRTALQATEQKLNAAGSAIAKNKYILTGTTWVVGAYAKVAKTAEEVGQKTLERVATLSGDQKGASSPSNASEGFGPPPPYPGSDESTLKSTSPPTDDQPQPKPSVTQ*	325
Plant	Physcomitrella patens	Pp3c19_9760V3.4	MDNMSKEEIHTVRVSNVSSKATEHDIQDFFSFSGEIEHIKLLKDGELSQIAFVTFKEAQALETALLLSGATVVDQAVTIAPADESEKLARDVEQVSLDATTAEPTDTTATKPATKSAQEIFQNMLAKGYVLGNNTMSKAKAFDEKHQLSANASQIAANARANVVSIDNKIGITQKLSAGTAAINQQVKAVDEKYHFAEKTRAAVQATEQKLNAAGSAIAKNKYVLTGTTWVVGAYAKVAKAAEEVGQKTLEKVSTFGASEQKTVEQKSSPKATTETSTSDDTDRNSRVSPPTDDSQPEPDGKPTVAN*	308
Plant	Physcomitrella patens	Pp3c20_4940V3.3	MTTNTVRVTNVSVKATAHDIHDFFSFSGEIENIELHRDGDTQIALVTFKEAQALDTALLLSGATVVDRAVNITPLEDELSPSINSIPRDKAFGNDGGFAGPSSHTPNQAVDVISTMLAKGFILGKDAVSKAKEFDAKHDLSASAKSSVVNFDKNIGISEKLSTGTAVVNKQMKAVDEKYQVSQKTRAALAVAEENVKTAGSALMKNRYILTGASWVTGAFSRVQKVAAEVSQKTIEKAHTMETDHNSGRVEEVRGAPSLYPGSDRATLAPLSATDYSGSQYPNLSYDNYAPLHSTERSTKVPPAQGLTL*	310
Plant	Physcomitrella patens	Pp3c22_22390V3.2	MSDDEIHTVRVSNVSPKATEHDIQDFFSFSGEIQYIKLIKDGALSQTAFVTFTDAQALETALLLSGATVVDQAVTITPADESEKLANSVEDVPLDANTAEPTSASAKPAKKSAEEFIKNILAKGSTLGNNTVSKAKAFDEKHQLTANATQLAANAKANVVKIDDKIGITKKLSAGTAAINQQVKVVDEKYQVAEKTRAAVQATEQKLNAAGSAIAKNRYVLTGTSWVVGAYAKVAKAAEEVSNKTLEKVATLGAGEHKSPARPSAERGSFHS*	273
Plant	Physcomitrella patens	Pp3c23_20750V3.2	MTTNTVRVTNISEKATAHDIHDFFSFSGEIVNIELQRSNDSQIALVTFKEPQALDTALLLSGATVVDRAVNITPLEDELPPSNNPIPREQAFENDGGYGGSSSQTSNQAVDVVATMLARGFILGKDALSKAKEFDAKHDLSASAKSSVVNFDKNTGISEKLNAGTAVVNQQMKAVDEKYQVSEKTRAVLAVAEEKVSTAGSVLMNNRYLLTGARWVTGAFSRVQKVAAEVSQKTKEKAGIMESEHNIGNLHENVRAAAAPTYPSSERATLSPPFAIDSSGSQYPNFGYNHYAPLHSTEQRSTRDSSSRDLIL*	313
Plant	Populus trichocarpa	PNT54382	MLSSINLSRAATAGIVLTHVCPTQPPPYYNLSLSPSLLLTKRTLLSSSFNNSRPSPLFSTQLAMSVKTVKVSNVSLGASERDLKEFFSFSGDIEYVEMKSDNERSQIAYVTFKDSQGADTAVLLSGATIVDLSVTVALDPDYQLPPAALAELSATGNKAPGDESALRKAEDVVSGMLAKGFILGKDAINKAKGFDEKHQLTSTASAKVVSFDKKIGLTEKISAGTTVVGDKVREVDQKFQVSEKTKSAFAVAEQKVSSAGSAIMSNRYVFTGAAWVTGAFNKVAKAAGDVGQKAKEKAGMAEEEQKRKMVDDFAQVHLSESPKASGASDQKPSKPPPAQGLIL*	344
Plant	Populus trichocarpa	PNT15757	MAVRTVKVSNISLTATDRDIEEFFSFSGDILYVEMRRESETTQLAYVTFEESHGADTAMLLSGAIVADLSVLITPVEDYQLPPEALSSKLEQKPPATDSAVKKAEDVVSTMLAKGFVLGKDAINKGKAFDERIHLTSNASATVASIDHKMGLSEKLSVGTAVVNEKVREMDEKFQVLVKTKTVLSVAEQKASSVGSAIMSNPYVSTGASWVSGAFTAVAKAAEDVSVMTREKVEKAEEEKIEIPVSEGSPAHIHHNGSPAGEPPVIPIDSADSKLANI*	279
Plant	Populus trichocarpa	PNT44630	MQLAMSVKTVKVSNVSLGASEQDLKEFFSFSGDIEYVEMKSENEQSQIAYVSFKDSQGADTAVLLSGATIVDLPVTVTLDPDYQLPPAALAALATENKAPSDESALHKAEDVVTGMLAKGFILGKDAINKAKSFDEKHQLTSTASAKVASLDKKIGLTEKISASTTVVGDKVREVDQKFQVSEKTKLALAAAEQKVSSAGSAIMSNRYVFTGAAWVTGTFNKVAKAAKEKVGMSEEEQKRKMVDDYAQVHLSESPKASGESEQQPSKPPPAQGLIL*	277
Plant	Populus trichocarpa	PNS95837	MYPGGYTAEVTSLSPKAEEKDVYEFFSHCGAIEHVEIIRSGEHACTAYVTFKDAYGLQTAILLSGATIVDQRVCITHWGTFVDEFDAWGSSSKDEGNTSSAGIPFNQFVSTPGEAVTVAQEVVKTMLSKGYILGKDAMVKAKAFDESHQVLATAAAKVSELSNRIGLTDKIYAGMETVKCVDEKYHVSEFTKSAASVTGTAAVSAATFTGKTAVAAANAVVNSTYFAKGALWVSGVLTQAAEAAADMGKKAST*	254
Plant	Populus trichocarpa	PNS95843	MYPGGYTAEVTSLSPKAEEKDVYEFFSHCGAIEHVEIIRSGEYACTAYVTFKDAYGLQTAILLSGATIVDQRVCITHWGTFVDEFDAWGSSSMDEGNTSSAGIPFGQFVSTPGEAVTVAQEVVKTMLSKGYILGKDAMVKAKAFDESHQVLATAAAKMSELSNRIGLADKIFAGMETVKGVDEKYHVSEFTKSAANAVVNSPYFTKGALWVSGVLTQAAEAAADLGKKAST*	232
Plant	Populus trichocarpa	PNT53131	MAQSDLTIQVLNLSPSVTRAELNTFFSYCGTVEKIELQKDKDQMQSALVTFTQPYAFQTALLLSDALLGGQPIRILSAHDIEIPITGPDIRKNHGSSRFVPAVQVAMQTVALKSVEMLSKARELEENYKLSEKGRTLALQTRAAVYDAEQAAENYVSAGAGWLSGALDKTSKRVLSLGTVKRNGPNS*	188
Plant	Populus trichocarpa	PNT06852	MQTRTVEVKNVSDLASEREVHEFFSFSGEIENIHIQRDHGQSKTAFVTFKDPKALEIALLLSGATIVDQIVAITPVENYVPNRELQEVRNMDIAIHVVPSEDFPSNVEGKTSPSGSGRVYVSRAQEVVTSMLAKGSAIGQDAMNKAKAFDEKHRLSANASEKVISFDRRVGLTEKLTVGISVVNEKVKSVDQRLHVSDKTMAAIFAAERKINDTGSAVKSSRYVSAGTAWLNGAFSKVAKAGQVAGTKTRAKFNSAVSNLTAKVGSTLGANIIRWTLKIISLYIYSYITIIRCIFFIVQYHCKLELMMGSS*	312
Plant	Populus trichocarpa	PNS90281	MLVTAMQTRTVEVRNVSDLASEREVHEFFSFSGEIEHIHIQRENGQSKTAFVTFKDPKALEIALLLSGATLVDRIVTITPAENYVLNRELQEVRNVENAVSVVPSENFPSNVEGKTSPSGSGRVYVSRAQEVVTSVLAKGSAISQDAMNKAKAFDEKHRLSASASEKVTSFDRRVGLTEKLTIGISVVNEKVKSVDQRLHVSDKTMAAIFAAERKLNDTGSAVKSSRYVSAGTAWLNGAFSKVARAGQVAGTKTREKFNLAVSNLTAKESPIAV*	275
Plant	Ricinus communis	RC29682G00280	MRVRTVKVSNVSLGATERDLREFFSFSGDIEYVEVRRDDEKSQIAYVTYKDSQGAETAVLLSGATIVDLSVSITLDPDYQLPPAVTQNKTPGGAESALRKAEDVVTSMLAKGFILGKDAVNKAKTFDDKHQLTSTASAKVVSLDKKIGLTDKISAGTTIVSDKVREVDQKFQVSEKTKTAFAAAEQKVSSAGVAIMKNRYVFTGASWVTGAFNKVAKAAGEVGQKAKEKVGMAEDEQKRKMVDDFAQVHLSESPKASSEGEHLPFKPAPVQGLIL*	276
Plant	Ricinus communis	RC30073G00780	MAITTVKVSNVSLGATEQDIKEFFSFSGDIDYVELLGDNERSQIAYVTFKDQQGAETAVLLSGATIVDQSVTIELAPDYKLPAAASVPTTATESSTASGAESAFQKAEDIVSSMLAKGFILGKDAVNKAKAFDEKHQFTSTATSKVASLDEKIGLTEKISAGTTLVNDKVREVDEKFRVSETTKSAFAAAEQTVSNAGSAIMKNRYVLTGASWVTGAFNRVAKAAGEVGQKTKEKVLAEEEQNQVAEGYTQIHGTDSPNMSEQMSKSSH*	270
Plant	Ricinus communis	RC29736G00040	MDQDGHAVEVTGLSPSTTEKDLYDFFSFSGSIEHVEIVRCGDYACTAYVTFKNAYSQETAVLLSGATILEERVCITRWGHYIDEFDLWNTPSLRVEDERESTHPPERSQYVPSAGEAVIMAQEVVKNMVAKGYVLGKDTLSKAKAFDESHQVTATAAAKVAEFTERIGLADKIFAGMEAMKSVDQKYHVSDMTKSAVSATGRTAVAAASTVVNSSYFSKGALWVSGALNRAAKAAADIGARGVQQ*	246
Plant	Ricinus communis	RC30072G00510	MQQQTRTVQVKHLSDLASEREIHEFFSFSGEIEHIDIVRENGESRTAFVTFKDPKALEIALLLSGATIVDKIVSITPVENYVPKRELQAKTSPPNNGRMYVNRAQEVVSTMLAKGSALGQDAMNKAKAFDEKHQLTASASAKVFSLDRKVGLTEKLTVGISVVNEKVKSVDQRLHVSDKTMAAIFAAERKINDTGSAVKSSRYVTAGAAWLNGAFDKVARAGQAAGTKTREKFNMAVSNLTAKESPIAV*	250
Plant	Ricinus communis	RC29822G01720	MYPGGYTAEVTCLSPKATVEDVHDFFAHCGSTEHVEIIRSGEYACTAYVTFRDAYALETAILLSGATIVDQQVCITHWGTYADGSYLWNGGSTYASTPGEAVTVAQEVVKTMIAKGYILGKDALIKAKDFDESYKVSATTAAKVAELSNRIGLTEKIQAGMETLRSVDEKYHVSNITASAILVTGTAAVVAATYTGKAAVAAANAVANSSYFAKGALWVSDVLIRAAQAAADFGHSKDSE*	241
Plant	Solanum lycopersicum	Solyc03g097110.3.1	MSARTVKVSNVSLSASEQDIKEFFSFSGDIEYVEMMSENERSQIAYVTFKDLQGAETAVLLSGATIIDQSVTIVPEPDYELPPTALVPIKVCIIYLDILATESANAAGGGSAIQKAEDVVSSMLAKGFILGKDAVNKAKTFDEKHQFTSTASAKVASLDQKIGLSEKINLGATIVNDKVKEMDQKFHVSEKTKSALAAAEQTVSTAGSAIMKNRYVLTGASWVTGAFNKVTKAAGEVGQKTKEKMAEEQQAKNSAEGYVPIHALSESPKASKTEEPTKPSSPKGLIL*	288
Plant	Solanum lycopersicum	Solyc06g072770.3.1	MSVKTVQVNNVSLGAKEQDIKEFFSFSGDIEYLEMKGESERSQVAYVTFKDPQSAETAVLLSGATIVDQSISIVLAPEYKLPPTASVSPVPNETTTAPAAGSAIQKAEDVVSSMLAKGFILGKDAVGKAKALDERHKITSTTSATVASIDQKYGLSEKITTGATIVNHKVKEMDQKFQVSEKSKSAFAAAEQTVSNAGSAIMKNRYALTGVTWAAGALSRVTKAAGEVGQKTKEKLAEEERRTFTKGHAQENTATSTKGSVQQQAADSAKGDVQELTPASAKGDVQELAAASAKGDVQELATASAKGDVHELAAASAKSDVQEHAATSAKSDVQEVAATSAKQEHTETQTGVEESTNPSLPPKA*	365
Plant	Solanum lycopersicum	Solyc08g076530.3.1	MSVKTVKVSNVSLGASERDIKEFFSFSGDIEYVEMQSDTERSQIAYVTFNDSQGADTAVLLSGATIVDMSVTVTLDPVYQLPPTAFTASVPTGKKSAGNSESAFQKAEDVVSSMLAKGYILGKDAVGKAKSFDEKHQLTSTATAKVASLDKKIGLTEKISIGTSIVNDKVREVDQKLQVSDKAKSALSAAEQTVSSAGSAIMKNRYVLTGSTWVAGAFSKVAKAAGEVGQMTKEKVGMTEDEQRQKMVTDFAQVHLSESPKASEFTEHQPAKPAPVQGLVL*	282
Plant	Solanum lycopersicum	Solyc02g067390.3.1	MYLGHYTAEVTSLSTKATEKDVDDFFSHCGEIEQVEIIRLSEYASIAYVTFKDTYALETAILLSGSTILDQCVHISRLEAHVDEDDPWDNYIDMVENGSSSAVHTNQFVSTPGEAVTMAQQVVETMIVKGYQLSKDALTKAKAFDESYHVSSTAAAKVADLSNRVGLTDKIRSGMETVKCVDEKYHLSELTMSAASFTGKTAAAAATAVVSSSYFSKGAFWVSDVLHRAAKVAADLGNNGVKKETAPIEMNQIGK*	256
Plant	Solanum lycopersicum	Solyc05g007200.3.1	MNPGGYTVEVTGLSPAATEKDVQEFFAFCGAIEHVEIVRAGEHASTAYVTFRNPHALETAVLLSGAAILDQRVCITSWGHYQDDFDYWNHSSWKPQEDCHSSDSQGHHFVSSAGEAVTLTQDVVKTMLSQGYVLGKGALGKAKAFDESHGLSATAVSKVADLSERIGLTDKFCAGVEVARSVDQRYHISDTTRSAVSATGRTAISAATAVINSSYFSKGALWMSGALSKAAQAAADLGSRGTNK*	245
Plant	Solanum lycopersicum	Solyc10g076890.2.1	MMENKLQGHFEPTCEWQHQDGADLLLVHLPEFKDKEGLKVQVSNCGVVKISGDVQANQTRLSFLKEIQLGKDHNVDAIKANFEKGEVRTVRVGNVSDLAAEREVREFFSFSGEIDHIEIRREQGQSKTAFVTFKDPKALEIALLLSGATIVDQIVSIKQAEDYVPSSETREVRIVDNAVNVAGESSSPLAEAKPTSPSNGRVNGKVYISKAQDVVSNVLAKGSAIRQDAMNKAKAFDEKHQLRATASARVISFDRRVGLTEKLTVGISVVNEKVKSVDQRLQVSDKTMAAVMAAERKLNDTGSAVKSSRYVNAGAAWLNGAFSKVAKAGQVAGTKTREKWNFALSNLTAKDPSIVA*	357
Plant	Solanum tuberosum	PGSC0003DMT400008196	MSARTVKVSNVSLGASEQDIKEFFSFSGDIEYVEMMSENERSQIAYVTFKDPQGAETAVLLSGATIIDQSVTIVPEPDYELPPTALVPIKATESANAAGGGSAIQKAEDVVSSMLAKGFILGKDAVNKAKTFDEKHQFTSTASAKVASLDQKIGLSEKINLGATIVNDKVKEMDQKFHVSEKTKSALAAAEQTVSTAGSAIMKNRYVLTGASWVTGAFNKVTKAAGEVGQKTKEKMAEEEQAKNSAEGYVPIHALSESPKASKTEEPTKPSSPKGLIL*	279
Plant	Solanum tuberosum	PGSC0003DMT400038377	MSVKTVKVSNVSLGASERDIKEFFSFSGDIEYVEMQSDTERSQIAYVTFNDSQGADTAVLLSGATIVDMSVTVTLDPVYQLPPTAFTASVPTAKKSAGNSESAFQKAEDVVSSMLAKGYILGKDAVGKAKSFDEKHQLTSTATAKVASLDKKIGLTEKISIGTSIVNDKVREVDQKLQVSDKAKSAFSAAEQKVSTAGSAIMKNRYVLTGTTWVAGAFSKVAKAAGEVGQMTKEKVGMTEDEQRQKMVTDFAQVHLSESPIASEFTEHQPAKPAPAQGLVL*	282
Plant	Solanum tuberosum	PGSC0003DMT400069547	MTVKTVQVNNVSLGAKEQDIKEFFSFSGDIEYLEMKGESERSQVAYVTFKDPQSAETAVLLSGATIVDQSISIVLAPEYKLPPTASVSPVPTESTNAPAAGSAIQKAEDVVSSMLAKGFILGKDAVGKAKALDERHKITSTTSATVASLDQKYGLSEKITTGATIVNHKVKEMDQKFQVSEKSKSAFAAAEQTVSNAGSAIMKNRYALTGVTWAAGALSRVTKAAGEVGQKTKEKLAEEERRTFTKGHAQENTATSSKGNVQQQAADSAKGDVQELAAASAKGDVQELAAASAKGHVQEHAATSAKSDVQEVAATSAKQEHPESQTGIEESTNLSLPPKA*	341
Plant	Solanum tuberosum	PGSC0003DMT400017749	MYLGHYTAEVTSLSTKATEKDVDEFFSHCGEIEQVEIIRLSEYASIAYVTFKDSYALETAILLSGSTILDQCVRISRLEAHVDEDDPWNNYIDKVENGSSSAVHTNQFVSTPGEAVTMAQQVVETMIVKGYQLSKDALTKAKALDESYHVSSTAAAKVADLSKRVGLTDKIQSGLETVKCVDEKYHLSELTMSAASYTGKTAVAAATAVVSSSYFSKGAFWVSDVLNRAAKVAADLGNNGVKKETVPIEMNQIGK*	256
Plant	Solanum tuberosum	PGSC0003DMT400065786	MNPGGYTAEVTGLSPTATEKDVQEFFGFCGAIEHVEIVRAGEHASTAYVTFRNPHALETAVLLSGAAILDQRVCITSWGHYQDEFDYWNHSSWKPQEDCYSSQDSQGHYFVSSAGEAVTLTQDVVKTMLSQGYVLGKGALGKAKAFDESHGLSATAVSKVADLSERIGLTDKFCAGVEVARSVDQRYHISDTTRSAVSATGRTAISAATAVVNSSYFSKGALWMSGALSKAAQAAADLGSRGINK*	246
Plant	Solanum tuberosum	PGSC0003DMT400018577	MQEVRTVRVGNVSDLAAEREVREFFSFSGEIEHIEIRREQGQSKTAFVTFKDPKALEIALLLSGATIVDQIVNITQEEDYVPSSETREVRLVDNAVNVAGESSSPLAEAKPTSPSNGRVNGKVYISKAQDVVSNVLAKGSAIRQDAMNKAKAFDEKHQLRATASARVISFDRRVGLTEKLTVGISVVNEKVKSVDQRLQVSDKTMAAVMAAERKLNDTGSAVKSSRYVNAGAAWLNGAFSKVAKAGQVAGTKTREKWNFALSNLTAKDPSIVA*	274
Plant	Sorghum bicolor	OQU91104	MEVKTVKVSNLSLNALKREITEFFSFSGDIEYVEMQSESEWSQLAYVTFKDSQGADTAVLLSGATIVDRAVIITPAENYQLPPEAHKQLSGANPSTESAVRKAEDVVSSMLAKGFVLSKDALNLARSFDERHNILSNATATVASLDRQYGLSEKINLGRAIVGSKVKEVDERYQVSELTKSALAAAEQKASFAGSAILSNQYVSAGASWLTSAFGMVTKAAGDMTSMAKDKVERAEEERKAIMWEERNGLVSDYAKIHLDEPSSWEPAVLPLESVDEQKLQAV*	284
Plant	Sorghum bicolor	EER89059	MAATAAEVPVEAPVRTVKVTNVSLSATVQDIKEFFSFSGDIEHVEMQSGDEWSQVAYVTFKDAQGAETALLLSGATIVDLSVIIAPAPEYQPPPTYSAPPMSGTRVAVGGDNTVVHKAEDVVSSMLAKGFVLGKDAVGKAKAFDEKHGFTSTAGAKVASIDKKIGLSDKITTGTSLVTGKVKEMDQKFQVSDKTKSAFAAAEQKVSSAGSAIMKNRYVFTGASWVTGAFNKVAKAATDVGTMTKEKMAAEEQQKGSGPSSGGHSYTPIR*	270
Plant	Sorghum bicolor	OQU85574	MTGTVKVHNVSLKATEQEISEFFSFSGEIVHVELQSCDERSQFAYITFRDNQGAERAMLLTGATIEHMAVIITPATDYKLPASVLADLESKNTGGMEFALQKAEDIVSSMLAKGFVLGMDAVEKAKTFDEKHQLTSTATAKVASLDKTMGLSQKFNTGTLVVNEKMKEMDEKYQVAEKTKSALAAAEQTVSTASSAIMSNRYILTGAAWVTDAYNKVATTTTDVSTKTKERVMAEWEGANHSGETAKVDSLESSEADEEECKRHEDDSTNNFIVDSPEMTCQENEHQVGERQMTNVEENKNHEGEIAVAHMQENTETAENPSCHESEVSKANAHDSILMTEQSEREHKQPEDEFAKTHVPGSPVTIPVTMSTIDRNSSNSPNKPDSAEGFL*	392
Plant	Sorghum bicolor	EES09901	MAVRLDPGYLRIGVAPAELCTSSPSSSASPQPCTSPNWTIDVSDVRTIKVTNVPLSATAENMKEFFSFSGEIEYVEMRRDSETSQVAYVTFKEFHGADTALLLSGSSMCGDVPVNIAPVEDYELPPEAYSHSHPEERSPAPGTPTGEAVKKAEEVVSTMLAKGFVLSKDALRRAQSFDGRHQQLLSTATARVASLDRRLGLSDKFSLGTAAARGAARGVDERFQVTERAWGAFSAAGEVVAGSPYASRGAAWVSAAVGAVARAASDVGAMTMEKVVRAEEEGTAAEQGNAGRVDVHDGQVAAAQHGAM*	309
Plant	Sorghum bicolor	EES12769	MAASTLSTVKVSNVSLKAAQRDIKEFFSFSGDIVHVEMQSGDELSQVAYITFKDNQGAETAMLLTGATIVYMAVIVTPANDYELPASVLAALEPKDTKPSALQKAEDIVGTMLAKGFILGRDALDKAKALDEKHQLTSTATARVSSFDKRIGLSEKISVGTSVVNDKVKEMDQKYQVSEKTKSALAAAEQSVSTAGSAIMKNRYVLTGAAWVTGAFSKVTSAANDVGAKAKEKIAVEQEHKNAEAGPAQANISEFPAAPRELDSEFTKIHVAETPEEIPVSTVTVPAVTEEELSEASPPADVPTKPEAAQGLVL*	315
Plant	Sorghum bicolor	EES12950	MSETGHTVQVTNLSSRVSESDLHEFFSFSGPIEHIELIRSEDYGATAYVTFKERFALETAVLLSGATIVDQPVCITYWGQPEETFNFWDRPTWETEEEIEYRNYQTCQYNTTPQEAFTVAQDIMKTMLAKGYVLSKDALAKARAFDESHGLTAAAAARAAELSKRIGLTDRVNAGVGAMRSVDETYRVRETTKTVATATGRTAAKVVNGIVTSSYFSAGAMMLSDALTRAAKAAADLAAHGRQS*	245
Plant	Sorghum bicolor	EER93456	MEEMGKRVVRTVRVRNISDLATEREVREFFSFSGEIEHVDIRFDTVASGRTAYVTFKDPKALEIALLLSGATIVDQIVNITPAEDYIYIPVTEQQLMVHEVTSTSSAPNAELEYSSEANTSPNSRVYVSKAHDVMTNVIAKGSAMRQDAVNKAKAFDEKHQLRANASARINSFDKRVGLSEKINNGLSVVNEKVKSVDQRLQVSDKTMAALLAAERKLNDTGSAVKTNRYVSAGTSWLNGAFSKVAKAGHVAGSRTREKFQLAVSNLTAKGPAVVA*	277
Plant	Theobroma cacao	Tc02v2_p015990.1	MANPNLTVVVLNLSPTVTLGELTAFFSYCGHVEKILLQGANKDGSQSALVTFRQPYAYQTALLLNDATFAGQPIRVLPKKDFANPPLPHQLPYVTEVCLSFSLSPCIYVYA*	112
Plant	Theobroma cacao	Tc03v2_p025740.1	MSSIKTVKVSNVSLGATQRDVKEFFSFSGDIEYVEMQSDNEQSQVAYVTFKDSQGAETAVLLTGAIIVDLSVSITLAPDYKLPPAAFLPPSAIQNKTPGGGDSAIRKAEDVVSGMLAKGFILGKDAVNKAKTFDEKHQLTSTASAKVASFDKKIGFTEKITAGTTVVSGKVREVDQKFQVSEKTKSAFAAAEQKVSSAGSAIMKNRYVFTGASWVTGAFNKVAKAAGDVGQKTKEKVGEAEEERKRKVVDDFAQIHLSESPKASAPSEQPLSKPAPAQGLIL*	283
Plant	Theobroma cacao	Tc05v2_p017860.1	MFIAHPVTSLTPQLLSLWKKVAFPLNFVKEKGKFFFFSGEERFDLFCHKRNFMAVRSVKVSNVSLGASEQDMKEFFSFSGEIEHVEMQSGNERSQIAYVTFKDSQGAETAVLLSGATIVDQSVIIDLAPDYKPPATASAPPATMNKSAGQAESAVQKAEDVVSSMLARGFILGKDAVTKAKAFDEKHQFTSTATAKVASLDQKIGLTEKISAGTTMVNDKVREMDQKFQVSEKTKSAFAAAEQTVSSAGSAIMKNRYVLTGASWVTGAFNRVAKAAGDVGQKTKEKVMAEEEQAHKSEGYAQINESEPPKAATSEQPSKPSSAQGLIL*	329
Plant	Theobroma cacao	Tc02v2_p026480.1	MSVPLDHTNQSLGAVPQTNGVANWTINVSDIRTVKVSNISLAASQRDIKEFFSFSGDIQYVEMRRETENAQVAYVTFKDSQGADTAMLLTGATIVDLSVNITPVEDYQLPPEALVSNMENKPAVTDSTVKKAEDVMSTMLAKGFVLGKDAINKAKAFDERHHFTSNASAAVTSIDQKMGLSEKLSIGTAVVNEKMREMNEIFQVSEKTKSAFAVAEQKASSAGTAIMSNRYVSTGALWLSNAFSAVAKAAEDVGMLTKEKVEKAEEEKKEIIYRERTGIISDFAQFHLDESSAAEPPIVPVDSTDSKLGMI*	312
Plant	Theobroma cacao	Tc02v2_p029990.1	MNDFGYTVEVTGLSPKATEKDVYDFFAFSGAIEHVEIVRSGDYACTSYVTFENAYSQETAVLLSGATILDQRVCITRWGQCEEEFHFWNPSRSHEDETSSSQPPLRSQFASHAGEAVSFAQDVVKAMLAKGYVLGKDALTKAKAFDESHQVSATAAAKVAELSERIGLTDKFCASVEAVRSVDQRYHVSENTKSAISTAGRTAAAAANTVISSSYFSRGALWVSGALDRAAKAAADLGNRGVHQ*	245
Plant	Theobroma cacao	Tc05v2_p020610.1	MQTRTVQVKNLSDLASEREIHEFFSFSGDIERIEIIGEPGQSKIAYVTFKDPKALEIALLLSGATIVDKIVVITCAENYLPKPEIHEARTADNTVSITPAEQSAPDAEQGRTSPPGSGRMYVSKAQDVVASMLAKGSAIRQDAVNKAKAFDEKHRLTASASAKVTSFDRRVGLTEKLTVGISVVNEKVKSVDQRLQVSDKTMAAIFAAERKINDTGSAVKSSRYVTAGTAWLNGAFSKVAKAGQVAGTKTREKFNMAMSNLTAKDPIAV*	270
Plant	Theobroma cacao	Tc04v2_p006600.2	MYPGGYTAEITSLSPKASEKDVRDFFAYCGAIEHVEIIRCGEYASTAYVTFKDAYSLETAVLLSGATIVDQSVCIARWGSNIDDAYPWEGSSWKALEDTSSTVTHMDQFVSTPGEAVTVVKKMLAKGYVLGKDALIKAKELDESYQVSATAAAKVSELSNKIGLTDKINTSMETVKSVDEKYHVSDITKSVVLVTGTAAVIAASFAGRTAVAAANAAVNSSYFAKGALWVSGMLSRAAQATADLGSHGNKETET*	255
Plant	Triticum aestivum	TraesCS2A02G445100.1	MATSTLSTVMVSNLSLKAALRDVKEFFSFSGDLVHVEMQSGDELSQVAYITFKDKQGAETAMLLTGATIVDMAVIVTPATYYELPADVLAALEPKDAKSSALEKAEDIVGTMLAKGFILGRDALDKAKALDEKHQLTSTATARVSSFDKRIGLSEKISVGTSVVNDKVKEMDQKYLVSEKTRSALAAAEQGVSTAGSAIMKNRYVLTGAAWVTGAFSKVANTANDVGAKAKEKIATEQEGKTVAAGYAQADMSDAHEKPRDLDGEITKIHVSENPEDIPISTAAVFPITVEDSSDASPPPPAAALPKKPEPAQGLIL*	318
Plant	Triticum aestivum	TraesCS2B02G466100.1	MATSTLSTVMVSNLSLKAALRDVKEFFSFSGDLVHVEMQSGDELSQVAYIAFKDKQGAETAILLTGATIVDMAVIVTPATDYELPADVLAALEPKDAKSSALEKAEDIVGTMLAKGFILGRDALDKAKALDEKHQLTSTATARVSSFDKRIGLSEKISVGTSVVNDKVKEMDQKYLVSEKTRSALAAAEQGVSTAGSAIMKNRYVLTGAAWVTGAFSKVANTANDVGAKAKEKIAAEQEGKTVAAGYAQADMSDAREKPRDLDGEVTKIHVSENPEDIPISTAAVFPITVDDSSDASPPPPATALPKKPEPAQGLIL*	318
Plant	Triticum aestivum	TraesCS2D02G444000.1	MATSTLSTVMVSNLSLKAALRDVKEFFSFSGDLVHVEMQSGDELSQVAYITFKDKQGAETAMLLTGATIVDMAVIVTPATDYELPADILAALEPKDAKSSALEKAEDIVGTMLAKGFILGRDALDKAKALDEKHQLTSTATARVSSFDKRIGLSEKISVGTSVVNDKVKEMDQKYLVSEKTRSALAAAEQGVSTAGSAIMKNRYVLTGAAWVTGAFSKVANTANDVGAKAKEKIAAEQEGKTVAAGYAQADMSDAHEKPRDLDGEITKIHVSENPEDIPISTAAVFPITVEDSSDASPPPPAAPKKPEPAQGLIL*	316
Plant	Triticum aestivum	TraesCS4A02G265800.1	MEVRTVKVGNISLSASKREITEFFSFSGDIEYVEMQSETDWSQLAYVTFKDSQGADTAVLLSGATIVDLSVIITPVENYQLPPEAHKQLPGENSPSAESAVRKAEDVVSSMMAKGFVLSKDALNMARSFDERHNIMSTATATVVSLDHQYGLSEKISLGRAVVGSKVKEVDERYQVSELTRSALAAAEQKASVAGSALMGNQYVSAGASWLTSAFGMVTKAAGDMGSMAKDKVDKAEEERKAIMWEERNGLVSEYAKIHLDEHSSWEPAVLPVESMDEQKLQAV*	285
Plant	Triticum aestivum	TraesCS4A02G458600.1	MAAATAPVEVPAAAPVRTVKVTNVSLSATEQDIKEFFSFSGDIEHVDMKSGDEWSQIAYVTFKDAQGAETALLLSGATIVDLSVIIAPAPEYQPPPTASAPLMNGTRVPVGGDNVVHKAEDVVSTMLARGFTLGKDAVGKAKSFDERHGFTSTATAKVASIDKKIGLSEKFTMGTTVVNEKVKEMDQKFQVSDKTKSALAAAEQTVSNAGSAIMKNRYVFTSASWVTSAFGKVAKAATDVSTMTKEKMSAEDQQKGSGGSSYTPIR*	267
Plant	Triticum aestivum	TraesCS4B02G049100.1	MEVRTVKVGNISLSASKREITEFFSFSGDIEYVEMQSETDWSQLAYVTFKDSQGADTAVLLSGATIVDLSVIITPVENYQLPPEARKQLPGENSPSAESAVRKAEDVVSSMMAKGFVLSKDALNMARSFDERHNIMSTATATVVSLDHQYGLSEKISLGRAVVGSKVKEVDERYQVSELTRSALAAAEQKASVAGSALMGNQYVSAGASWLTSAFGMVTKAAGDMGSMAKDKVDKAEEERKAIMWEERNGLVSEYAKIHLDEHSSWEPAVLPVESMDEQKLQAV*	285
Plant	Triticum aestivum	TraesCS4D02G049200.1	MEVRTVKVGNISLSASKREITEFFSFSGDIEYVEMQSETDWSQLAYVTFKDSQGADTAVLLSGATIVDLSVIITPVENYQLPPEARKQLPGENSPSAESAVRKAEDVVSSMMAKGFVLSKDALNMARSFDERHNIMSTATATVVSLDHQYGLSERISLGRAVVGSKVKEVDERYQVSELTRSALAAAEQKASVAGSALMGNQYVSAGASWLTSAFGMVSKAAGDMGSMAKDKVDKAEEERKAIMWEERNGLVSEYAKIHLDEHSSWEPAVLPVESMDEQKLQAV*	285
Plant	Triticum aestivum	TraesCS6A02G265600.1	MLINSFMVIPFFKTNMFSTVKVHNVSLQASERVIKEFFSFSGDIVHVEMQSGDGRSQFAYITFRDEQGAERAMLLTGATIVDMAVIITPATNYQLPAAVLDDLESKSPSSIEAALRKAEDVAGSMLAKGFILGKDAVEKAKTFDETHQLTSTASAKVSSIDKSLGLSEKISTGTIVVNEKMKEMDEKYQVAEKTKSALVAAEQTVSTAGSKFMRHRYILTGAAWVTGAYSKVATTATEAYNKERAMAEQEDELVKSSEEAGQESKCQEGDPAKVSVPENTETGQMADQEGECPKTNKPEDTETGKDEQKSQDGDIAKAQTQENTEITAEEHKHQEAELPKASTPESLLMAEQTEQEHKQPVTEVANSNIPSSPVTIAVCMATDDAKSSNSPKKPGPA*	398
Plant	Triticum aestivum	TraesCS6B02G292900.1	MLINSFMFIPFFKTSMFSTVKVHNVSLQASERVIKEFFSFSGDIVHVEMQSGDKRSQFAYITFRDEQEAERAMLLTGATIVDMAIIITPATNYQLPAAVLADLESKSPSSIEAALRKAEDVAGSMLAKGFILGKDAVEKAKTFDETHQLTSTASAKVSSIDKSLGLSEKISTSTIVVNEKMKEMDEKYQVAEKTKSALVAAEQTVSTAGSKIMRHRYILTGAAWVTGAYSKVATTATEAYNKERAMAEQEDELAKSSEEAGQESKCQESDPAKVPVPENTETGQMADQEGECPKTNKPEDTEMGNGEQKGQDAEIAKAQTQENTGITAEEHKHREAELPKASTPESFLMTEQTEQEHKQPVTEVANSDIPSSPVTIPVCMATDDANSSNSPKKPGPA*	398
Plant	Triticum aestivum	TraesCS6D02G249000.1	MFSTVKVHNVSLQASERVIKEFFSFSGDIVHVEMQSGDKRSQFAYITFRDEQEAERAMLLTGATIVDMAIIITPATNYQLPAAVLADLESKSPSSIEAALRKAEDVAGSMLAKGFILGKDAVEKAKTFDETHQLTSTASAKVSSIDKSLGLSEKISTGTIVVNEKMKEMDEKYQVAEKTKSALVAAEQTVSTAGSKIMRHRYILTGAAWVTGAYSKVATTATEAYNKERAMAEQEDELAKSSEEAGQESKCQESDPAKVPVPENTETGQMADQEGGCPETNKPEDTEMGNGEQKDRDAEIAKAQTQENTGITAEEHKHREAELPKASTPESFLMTEQTEQEHKQPVTEVANSDIPSSPVTIAVCMATDDANSSNSPKKPGPA*	383
Plant	Triticum aestivum	TraesCS7A02G030900.1	MTNFGISIQVRTVKVTNVSLSATEQDIKEFFSFSGDIEHVDMKSGDEWSQVAYVTFKDAQGAETALLLSGATIVDLSVIIAPAPEYQPPPTASAPLMSGTRVPAGGDNVVHKAEDVVSTMLARGFTLGKDAVGKAKSFDERHGFTSTATAKVASIDKKIGLSEKFTMGTTVVNEKVKEMDQKFQVSDKTKSALAAAEQTVSNAGSAIMKNRYVFTSASWVTSAFGKVAKAATDVSTMTKEKMSAEDQQKGSGGSSYTPIR*	261
Plant	Triticum aestivum	TraesCS7D02G027100.1	MAAATAPVEVPAAAPVRTVKVTNVSLSATEQDIKEFFSFSGDIEHVDMKSGDEWSQVAYVTFKDAQGAETALLLSGATIVDLSVIIAPAPEYQPPPTASAPLMSGTRVPVGGDNVVHKAEDVVSTMLARGFTLGKDAVGKAKSFDERHGFTSTATAKVASIDKKIGLSEKFTMGTTVVNEKVKEMDQKFQVSDKTKSALAAAEQTVSNAGSAIMKNRYVFTSASWVTSAFGKVAKAATDVSTMTKEKMSAEDQQKGSGGSSYTPIR*	267
Plant	Triticum aestivum	TraesCS2A02G521600.1	MSGTGYTVEVTNLSSSASENDLHEFFSFSGPIEHIDLIRSGGYGSTAYVTFKEPYALETAVLLSGATIVDQPVCISRWGQPDEPCNFWDRPTWQVEEEIEYRDYQSCQFNATPQEALTVAQDVVKTMLSRGYILSKDALSRARAFDESHQLSGSAAAKAAELSRRLGLTDRVSAGVGAIRSVDETYRVTETTKTVTTATGRTAVKVMNTIVTSSYFSAGAMMVSEALTRAAKAAENLAAHGRQH*	245
Plant	Triticum aestivum	TraesCS2B02G551100.1	MSGTGYTVEVTNLSSSASENDLHEFFSFSGPIEHIDLIRSGGYGSTAYVTFKEPYALETAVLLSGATIVDQPVCISRWGQPDEPCNFWDRPTWQVEEEIEYRDYQSCQFNATPQEALTVAQDVVKTMLSRGYILSKDALSRARAFDESHQLSGSAAAKAAELSRRLGLTDRVSAGVGAIRSVDETYHVTETTKTVATATGRTAVKVMNTIVTSSYFSAGAMMVSEALTRAAKAAENLAAHGRQN*	245
Plant	Triticum aestivum	TraesCS2D02G523400.1	MSGTGYTVEVTNLSSSASENDLHEFFSFSGPIEHIDLIRSGGYGSTAYVTFKEPYALETAVLLSGATIVDQPVCISRWGQPDEPCNFWDRPTWQVEEEIEYRDYQSCQFNATPQEALTVAQDVVKTMLSRGYILSKDALSRARAFDESHQLSGSAAAKAAELSRRLGLTDRVSAGVGAIRSVDETYHVTETTKTVATATGRTAVKVMNTIVTSSYFSAGAMMVSDALTRAAKAAENLAAHGRQN*	245
Plant	Triticum aestivum	TraesCS5A02G387800.1	MEEGRRGTRTVRVRNISDLAGEREVREFFSFSGEIDHVDITPDGAAAGRTAYVTFKDAKALEIALLLSGATIVDRVVNITSAEDYIYIPVNEQQLMVNEVTSTAPTADLEQPTEANASPTSVYASKAHDVMTTVIARGSAIRQDAVNKAKSFDERHQLRANASARISSFDRRVGLSEKLNTGISAVNEKVKTVDQRLHVSDKTMAALLAAERKLNNTGSAVKTNRYVSAGTSWLNGAFSKVAKAGHVAGSRTREKFQIAVSNISAKGPAVVA*	273
Plant	Triticum aestivum	TraesCS5B02G392900.1	MEEGRRGTRTVRVRNISDLAGEREVREFFSFSGEIDHVDIRPDGAAAGRTAYVTFKDAKALEIALLLSGATIVDRVVNITSAEDYIYIPVNEQQLVVNEATSTAPTADLEQPTEANTSPTSVYASKAHDVMTTVIARGSAIRQDAVNKAKSFDEKHQLRANASARISSFDRRVGLSEKLNTGISVVNEKVKTVDQRLHVSDKTMAALLAAERKLNDTGSAVKTNRYVSAGTSWLNGAFSKVAKAGHVAGSRTREKFQIAVSNISAKGPAVVA*	273
Plant	Triticum aestivum	TraesCS5D02G397700.1	MEEGRRGTRTVRVRNISDLAGEREVREFFSFSGEIDHVDITPDGAAAGRTAYVTFKDAKALEIALLLSGATIVDRVVNITSAEDYIYIPVNEQQLVMNEVTSTAPTADLGQPTEANASPTSVYASKAHDVMTTVIARGSAIRQDAVNKAKSFDEKHQLRANASARISSFDRRVGLSEKLNTGISVVNEKVKTVDQRLHVSDKTMAALLAAERKLNDTGSAVKTNRYVSAGTSWLNGAFSKVAKAGHVAGSRTREKFQIAVSNISAKGPAVVA*	273
Plant	Zea mays	Zm00001d033766_P001	MEVKTVKVSNLSLNALKREITEFFSFSGDIEYVEMQSESEWSQLAYVTFKDSQGADTAVLLSGATIVDRAVIITPAENYQLPPEAHKQLSGANVSTESAVRKAEDVVSSMLAKGFVLSKDALNLARSFDERHNILSNATATVASLDRQYGLSEKISLGRAIVGSKVKEVDERYQKASVAGSAILSNQYVSAGASWLTSAFDMVTKAAGDMTSMAKDKVERAEEERKAIMWEERSGLVSEYAKIHLDEPSSWEPAVLPLESVDEQKLQAV*	270
Plant	Zea mays	Zm00001d026206_P001	MATSTLSTVKVSNVSLKAAQREIKEFFSFSGDIVHVEMQSGDELSQVAYITFKDNQGAETAMLLTGATIVDMAVIVTPANDYELPASVLAALEPKDTKPSALQKAEDIVGTMLAKGFILGRDALDKAKALDEKHQLTSTATARVSSFDKRIGLSEKISVGTSVVNDKVKEMDQKYQVSEKTKSALAAAEQSVSTAGSAIMKNRYVLTGAAWVTGAFSKVTSAANDVGAKAEEKIAVEQEDKNAEGGPGQANISDIPAAHRELDSEFANIHVSETPEDVPISTVTVPAVTDEEPSTATPAAEVSKKPEAAQGLIL*	315
Plant	Zea mays	Zm00001d002475_P001	MATSMLSTVKVSNVSLKAAQRDIKEFFSFSGDIVHVEMQSFDELSQVAYITFKDKQGAETAMLLTGATIVDMAVIVTPANDYELPSSVLAALEPKDTKPSALQKAEDIVGTMLAKGFILGRDALDKAKALDEKHQLTSTATARVSSFDKRIGLSEKISVGTSVVNDKVKEMDQKYQVSEKTKSALAAAEHSVSTAGSAIMKNRYVLTGAAWVTGAFSKVTSAANEAGAKAKEKIAVEQEHKNAEGGPAQANISETHEAHRGLDGGFSRLHDSETPEDIPISTASVPAVTDEEPSKASPPAGVPEKPEAAHELVL*	315
Plant	Zea mays	Zm00001d051524_P002	MAGTGTVKVHNVSLKASEQDISEFFSFSGEIVHVELKSCDERSQFAYITFRDNQGAERAMLLTGATIEDMAVIITPATDYKLPAFVLADLESKNTGGMESALQKAEDIAVSMLAKGFVLGMDAVEKAKAFDEKHQLTSTATAKVASLDRTMGLSQKFSTGTLVVNEKMKEMDEKYQVAEKTKSALAAAEQTVSTASSAIMSNRYILTGAAWVTDAYNKVATTTTDASKSIKERMMAEQEGANQSGETAKVDLLEISEADEQEWKRHEDDSAKNAVQESPEMTCQESEHQAGERQMTNVAGNSKTGIEEHKNHEGEIAVVAHMQENMDTAEKNPSCHESEVSKANVHDSVLMTEQSEREHNQCEGEFANSHVPGSPVTIPVTVSTIDGNSSNSPKKPDSA…	404
Plant	Zea mays	Zm00001d054082_P001	MAGTGTVKVHNVSLKASEQDISEFFSFFGEIVHVELKSCDERSQFAYITFRDNQGAERDMLLTGATIEDMAVIITPAIDYKLPAFVLADLESKNTGGMESALQKAEDIAVSMLAKGFVLGMDAVEKAKAFVEKHQLTSTATAKVASLDRTMGLSQKFSTRTLVVNEKMKEMDEKYQVAEKTKSALAATEQTVSTASSVIMSNRYILTGAAWVTDAYNKVATTTTDASKSIKERMMAEQEGANQSGETAKVDLLEISEANEQEWKRHEDDSTKNVVQESPEMTC*	284
Plant	Zea mays	Zm00001d013419_P001	MEVKTVKVSNLSLNVLKRELTEFFSFSGDIEYVEMQSESEWSQLAYVTFKDSQGADTAVLLSGATIVDRAVIITPAENYQLPPEAHKQLSGANVSTESAVRKAEDVVSSMLAKGFVLSKDALNLARSFDERHNILSNATATVASLDRQYGLSEKINLGRAIVGSKVKEVDERYQVSELTKSALAAAEQKASFAGSAILSNQYVSVGASWLTSAFTLVTKAAGDMTSMAKDKVERAEEERKAIMWEERNGLVSDYAKIHLDEPSSWEPAVLPLESVDEQKLQAV*	284
Plant	Zea mays	Zm00001d014267_P001	MYLSKLPIDSCRPTFFKATMAGTGTVKIHNVSLKASEQDISEFFSFSGEIVHVELKSCDERSQSAYITFRDNQGAERAMLLTGATIEDMAVIITPATDYKLPAFVLADLESKNTGGMESALQKAEDIAVSMLAKGFVLGMDTVEKAKAFDEKHQLTSTATAKVASLDRTMGLSQKFSTGTLVVNEKMKEMDEKYQVAEKTKSALAAAEQTISTASSVIMSNRYVLTGAAWVTDAYNKVATTTTDASKSIKERMMAEQEGANQSGETTKVDLLEISEADEKEWKRHKDDSTKNVVQESPEMTCQESEHQAGERQMTNVAGNSKTGIEEQKNHEGEIAVVSHMQENIDTAEKDPSCHESEVSKANVHDSVLMTKQSEREHNQPEGEFANTHVPGSPVTILV…	423
Plant	Zea mays	Zm00001d035920_P001	MSATAVKFPVEAPPRTVKVTNVSLSATVQDIKEFFSFSGDIEHVEMQSGDEWSQIAYVTFKDAQGAETALLLSGATIVDLSVIIGPAPEYQPPPIASAPPMSGTRVPVGGDNNVVHKAEDVVSTMLAKGFVLGKDAVGKAKAFDEKHGFTSTAGAKVASIDKKIGLSNKITTGTSLVSGKVKEMDQKFQVSDKTKSAFAAAEQKVSSAGSAIMKNRYVFTGASWVTGAFNKVAKAATDVGTMTKEKMAAEEQQKGFSGPSSRSHSYTPIR*	271
Plant	Zea mays	Zm00001d046992_P001	MYLSKLPIDSCPPTFFKATMAGTGTVKVHNVSLKASEQDISEFFSFSGEIVHVELKSCDERSQFAYITFRDNQGAERDMLLTGATIEDMAVIITPATDYKLPAFVLADLESKNTGGMESALQKAEDIAVSMLAKGFVLGMDAVEKAKAFVEKHQLTSTATAKVASLDRTMGLSQKFSTGTLVVNEKMKEMDEKYQVAEKTKSALAAAEQTVSTASSVIMSNRYILTGAAWVTDAYNKVATTTTDASKSIKERMMAEQEGANQSGETAKVDLLEISEADEQEWKRHEDDSTKNVVQESPEMTCQESEHQAGERQMTNVAGNSKTSIEE*	328
Plant	Zea mays	Zm00001d045559_P001	MATAVEVPVEAPVRTVKVTNVSLSATVQDIKEFFSFSGDIDHVEMQSGDEWSQVAYVTFKDAQGAETALLLSGATIVDLSVIIAPAPEYQPPPTASAPPMSGTRVPVGGGDNNVVHKAEDVVSTMLAKGFVLGKDAVGKAKAFDEKHGFTSTAGATVASIDKKIGLTDKITTGTSLVSGKVKEMDQKFQVSDKTKSALAAAEQKVSSAGSAIMKNRYVFTGASWVTSAFNKVAKTATDVGTMTKEKMAAEEHHKGSGPSSGGHSYTPIR*	270
Plant	Zea mays	Zm00001d053093_P001	MAVRLDPGSLRIAVAPAEFCTSSPSASASSSPQLCTSPNWTIDVSDVRTIKVTNVPLSATAENMKEFFSFSGEIEYVEMRRDSETSQVAYVTFKEFHGADTALLLSGSSMCGDVSVNIAPVEDYELPPEAYSHAGARSPGPGTPTGEAVKKAEEVVSTMLARGFVLSKDALRRAQSFDGRHQQLLSTATARVASLDRRLGLSDKFSLGTAAARGAARGVDERFQVTERAWGAFSAAGEVVAGSPYASRGAAWVSAAVGAVARAASDVGAMTMEKVGRAEEEGEASAAEHGHYASSRVDVHDGQGGGAAQHGDHNKAM*	318
Plant	Zea mays	Zm00001d026425_P007	MSETGHTVQVTNLSSRVSESDLYEFFSFSGPIEHVELIRSGEYGATAYVTFKERFALETAVLLSGATIVDQPVCITYWGQPEETFNFWDRPTWEVEEEIEYTSYQSCQYNTTPQEALTVAQDIVKTMLAKGYVLSKDALAKARAFDESRGLTAAAAAKAAELSKRIGLTDRVSAGVGAMRSVDETYRVTETTKTVATATGRTAAKVVNGIVTSSYFSAGAMMLSDALTRAAKAAADLAAHGRQS*	245
Plant	Zea mays	Zm00001d002122_P007	MSETGHTVQVTNLSSRVSESDLHEFFSFSGPIEHIELIRSEGYGATAYVTFKERFALETAVLLSGATIVDQPVCITYWGQPEGTFNFWDRPTWEVEEEIEYRNYQTCQYNTTPQEAFTVAQDIMKTMLEKGYVLSKDALAKARAFDESYGLTAAAAARAAELSKRIGLTDRVNAGVGAMRSVDETYRVRETTKTVATATGRTAAKVVNGIVTSSYFSAGAMILSDALTRAAKAAADLAAHGRQN*	245
Plant	Zea mays	Zm00001d013271_P001	MEEMGKRAVRTVRVRNISDLATEREVREFFSFSGEIEHVDIRFDTVSSGRTAYVTFKDPKALEIALLLSGATIVDQIVNITPAEDYIYIPVTEQQLMVHEVTSRSSASNAELEYSSEANVSPNSRVYVSKAHDVMTNVIAKGSAMRQDAVNKAKAFDEKHQFRANASARINSFDKRVGLSEKINNGISVVNERVKSVDQRLHVSDKTMAALLAAERKLNDTGSAVKTNRYVSAGTSWLNGAFSKVAKAGHVAGSRTREKFQLAVSNLTAKGPAVVA*	277
